13 **Abstract:**

14 Hepatitis E virus (HEV) is an RNA virus responsible for over 20 million infections  
15 annually. HEV's open reading frame (ORF)1 polyprotein is essential for genome replication,  
16 though it is unknown how the different subdomains function within a structural context. Our data  
17 show that ORF1 operates as a multifunctional protein, which is not subject to proteolytic  
18 processing. Supporting this model, scanning mutagenesis performed on the putative papain-like  
19 cysteine protease (pPCP) domain revealed six cysteines essential for viral replication. Our data  
20 are consistent with their role in divalent metal ion coordination, which governs local and  
21 interdomain interactions that are critical for the overall structure of ORF1; further, the "pPCP"  
22 domain can only rescue viral genome replication *in trans* when expressed in the context of the  
23 full-length ORF1 protein but not as an individual subdomain. Taken together our work provides  
24 a comprehensive model of the structure and function of HEV ORF1.

25 **Significance Statement:** The development of non-teratogenic and potent antiviral therapies  
26 against HEV have been hindered by an incomplete understanding of the viral replication cycle.  
27 Our work provides a mechanistic insight into the complex replicative cycle of this understudied  
28 human pathogen and identifies a novel domain-domain interaction that is vital for replicative  
29 fitness.

30 **Introduction:**

31 Hepatitis E has a global disease burden of over 20 million cases per annum, leading to  
32 approximately 70,000 fatalities (Rein et al., 2012). This burden is especially pronounced in  
33 immunocompromised individuals and pregnant women, the latter of whom experience a close to  
34 30% mortality rate in the third trimester (Khuroo & Kamili, 2003) and/or approximately 3,000  
35 stillbirths (Rein et al., 2012). HEV infection can be prevented with a prophylactic vaccine which  
36 is currently only licensed in China. Presently, treatment is limited to ribavirin (RBV) and  
37 pegylated type I interferon (IFN) (Kamar et al., 2014). However, these therapies are plagued  
38 with considerable side effects, as RBV is teratogenic and thus cannot be administered during  
39 pregnancy, and IFN therapy can lead to transplant rejection in organ transplant recipients  
40 (Haagsma et al., 2010). Furthermore, HEV strains with fitness-enhancing mutations have been  
41 identified in patients showing clinical resistance to ribavirin treatment (Todt et al., 2018). One  
42 clinical case study has suggested that sofosbuvir, a drug approved for hepatitis C virus (HCV)  
43 treatment, may have a beneficial additive effect when used in combination with ribavirin,  
44 however other studies have observed no therapeutic benefit, and the use of this drug for HEV  
45 treatment remains controversial (van der Valk et al., 2017; van Wezel et al., 2019). Other  
46 clinical drugs are currently not approved for the treatment of hepatitis E, obviating the need for  
47 direct acting antivirals and a better understanding of the viral replication cycle.

48 HEV is a (+) ssRNA virus in the *Orthohepevirus* genus in the *Hepeviridae* family of viruses  
49 (Smith et al., 2014). The genome of HEV has a 5'-methylated cap and a 3'-poly (A) tail and is  
50 comprised of three partially overlapping open reading frames (ORFs). ORF1 encodes the viral  
51 replicase (Koonin et al., 1992), ORF2 encodes the capsid protein (Reyes et al., 1993; Tam et  
52 al., 1991), and ORF3 encodes a viroporin necessary for viral egress (Ding et al., 2017). While  
53 the primary functions of ORF2 and ORF3 have been characterized, much of ORF1 remains to  
54 be understood. ORF1 has been organized into seven domains based on prior bioinformatic  
55 analysis (**Figure 1A**) (Koonin et al., 1992), only four of which have been functionally  
56 characterized in some detail (namely the methyltransferase (Magden et al., 2001),  
57 macrodomain (Parvez, 2015), helicase (Devhare et al., 2014; Karpe & Lole, 2010), and RNA-  
58 dependent RNA polymerase (RdRp) (Koonin, 1991; van der Heijden & Bol, 2002)). Of the

59 remaining domains of HEV ORF1, the putative papain-like cysteine protease (pPCP) has been  
60 the subject of some debate; several groups assessing the functionality of this region have  
61 disagreed on the presence of protease activity (Ansari et al., 2000; Kanade et al., 2018; Karpe &  
62 Lole, 2011; Paliwal et al., 2014; Parvez, 2013; Parvez & Khan, 2014; Perttilä et al., 2013; Ropp  
63 et al., 2000; Sehgal et al., 2006; Suppiah et al., 2011) and if so, whether this region has viral  
64 protein or host cellular protein targets. Evidence supporting and refuting these activities have  
65 been building for almost three decades, however the possibility remains that this region may  
66 exert orthogonal activities.

67 Full characterization of ORF1's functions as well as HEV's full replication cycle have been  
68 hampered by a dearth of structural information of the ORF1 protein. Though two structures of  
69 small regions with ORF1 have been recently obtained - one being the amphipathic "thumb" of  
70 the RNA dependent RNA polymerase (RdRp) (Oechslin et al., 2022), the other being an intra-  
71 ORF1 region spanning portions of the putative PCP and hyper-variable region (HVR) (Proudfoot  
72 et al., 2019) -, neither are functional outside of the context of the ORF1 protein, limiting our  
73 understanding of how uncharacterized regions of ORF1 fold and operate. Without structural  
74 information readily available, *in silico* analyses have been previously attempted to glean  
75 information of ORF1's functions, with limited success. For instance, bioinformatic analysis of  
76 the HEV pPCP of genotype 1 SAR55 strain predicted three disulfide bridges and a putative zinc-  
77 binding motif (Parvez & Khan, 2014; Saraswat et al., 2019), though previous computational  
78 approaches have been lacking in power and iterative ability. With the advent of AlphaFold  
79 (Jumper et al., 2021; Tunyasuvunakool et al., 2021), research into protein structure has entered  
80 a new era where testable hypotheses can be generated in an iterative, high-throughput manner.

81 To understand how the putative PCP - and ORF1 more broadly - operate, we opted to combine  
82 biochemical, genetic, mass spectrometric, and computational approaches. We identified amino  
83 acid motifs within the pPCP that are vital for viral replication via an unbiased triplet alanine  
84 scanning mutagenesis, as well as characterized the necessity or dispensability of eight  
85 conserved cysteines within the putative PCP domain. Of these eight, six were identified as  
86 indispensable, forming a hexa-cysteine motif commonly seen in host metal-binding proteins. We  
87 established a transcomplementation system to demonstrate that the putative PCP is only  
88 functional within the context of the full length ORF1 protein. We have been able to validate A.I.  
89 driven protein structure prediction programs with testable genetic and biochemical data; using  
90 the AlphaFold algorithm (Jumper et al., 2021), we determined the replicative capacity lost via  
91 site-directed mutagenesis to not be due to a deficiency of proteolytic activity, but rather a loss in  
92 structural integrity due to an inability to bind divalent metal ions. Moreover, we identified a novel  
93 interdomain divalent metal ion binding interaction between the pPCP and the upstream  
94 uncharacterized Y-domain of HEV ORF1. Further, utilizing a tolerable epitope locus within  
95 ORF1's hyper-variable region (HVR) (Szkolnicka et al., 2019), we were able to purify ORF1  
96 protein for downstream inductively-coupled plasma mass spectrometry (ICP-MS) analysis, and  
97 discovered that point mutants in either the pPCP or Y-domain differed in divalent ion binding  
98 activity. Taken together, our work demonstrates that HEV ORF1 likely functions as one large  
99 multidomain protein that does not undergo processing, and that the putative catalytic residues  
100 predicted by prior bioinformatic analyses are actually structural in nature via their ability to bind  
101 divalent metal ions.

## 102 **Results:**

103 **Mutations within the HEV putative protease domain render the virus replication**  
104 **incompetent.** The functional domains and genome organization of HEV (**Figure 1A**) were first

105 suggested based on bioinformatic alignments of the genotype 1 Burma reference strain with  
106 other well-characterized viruses in 1992 (Koonin et al., 1992), and the putative protease domain  
107 was proposed based on limited sequence identity with the distantly related rubella virus (RUBV).  
108 These analyses suggested the existence of a putative papain-like protease within HEV ORF1,  
109 and that the proposed catalytic dyad were residues C483 (which is highly conserved across all  
110 known HEV genotypes) and H590 -which is variable across all 8 known HEV genotypes  
111 (**Supplementary Figure 1**). Since, tools have been developed to systematically interrogate the  
112 HEV genome, such as the development of infectious clones of cell-culture adapted strains  
113 (Johne et al., 2014; Shukla et al., 2012; Shukla et al., 2011), and reporter replicons utilizing  
114 green fluorescent protein (GFP) (Emerson et al., 2004) or Gaussia luciferase (Gluc) (Graff et al.,  
115 2005) (**Figure 1A**).

116 To determine the importance of the residues that have been proposed as the putative catalytic  
117 dyad, we mutated C483 and/or Y590 to chemically similar amino acids, alanine, or in the case  
118 of Y590, residues found in other genotypes of HEV. Huh7.5 human hepatoma cells were  
119 transfected with *in vitro* transcribed RNA from a recombinant version of an HEV genome derived  
120 from the KernowC1/p6 strain (Shukla et al., 2011) in which ORF2 and ORF3 are replaced by a  
121 secreted version of Gaussia luciferase (Gluc) (Shukla et al., 2011), termed Kc1/p6 Gluc (**Figure**  
122 **1A**). Gluc activity as a measure for the efficiency of RNA dependent RNA polymerase-mediated  
123 viral replication was quantified in the culture supernatants over 4 days post RNA transfection (4  
124 d.p.t). Transfection of the wild type (wt) Kc1/p6 Gluc into naïve Huh7.5 human hepatoma cells  
125 led to a ca. 34,000-fold increase in luminescence over mock cells. Transfection of a polymerase  
126 deficient genome harboring a mutation in the highly conserved GDD motif of the RNA-  
127 dependent RNA polymerase (deemed pol (-)) expectedly did not augment Gluc activity (**Figure**  
128 **1 B-C**). Notably, genomes harboring mutations in the C483 and/or Y590 positions were  
129 incapable of establishing stable replication (**Figure 1 B-C**).

130 We next sought to understand if this lack of viral replication brought on by mutating the highly  
131 conserved C483 was unique to the Kc1/p6 cell culture adapted strain of HEV, or if it translated  
132 to other known human-tropic HEV strains. Thus, we mutated the C483 residues in the Gluc  
133 reporter genome configurations of HEV strains SAR55 (genotype 1), SHEV3 (genotype 3), and  
134 TW6196E (genotype 4) (Ding, Nimgaonkar, et al., 2018), and transfected *in vitro* transcribed  
135 RNA into HepG2C3A human hepatoma cells similar to (**Figure 1 B-C**). In line with our  
136 observations using Kc1/p6 replicon, HEV RNA replication was severely impaired in SAR55,  
137 SHEV3 and TW6196E genomes harboring the C483A mutation (**Figure 1 D-G**). Notably,  
138 Gaussia luciferase levels were equivalently as low as the pol (-) versions of the reporter  
139 replicons.

140 To determine if this deficiency was due to a disruption in RNA folding, we mutagenized C483  
141 into each available codon for cysteine and alanine (**Figure 1H**). These analyses demonstrated  
142 that encoding the alternate cysteine had a mild negative affect on viral replication efficiency,  
143 while any alanine codon usage brought replication levels down to those of the Pol (-) mutant  
144 (**Figure 1H**), suggesting that the deficiency primarily lies in protein folding or function.  
145 Collectively, these data demonstrate the necessity of these residues for viral fitness, despite  
146 Y590 being heterogeneous across HEV viral genotypes.

147 **HEV ORF1 putative PCP cannot function outside of the context of the full-length protein,**  
148 **and C483A replication deficiency is rescuable *in trans*.** To probe further the mechanism  
149 underlying the functional impairments of the C483 mutants, we devised an experimental system  
150 in which HEV RNA replication is uncoupled from protein translation. Following our previously

151 established successful transcomplementation approach for studying HEV ORF3's viroporin  
152 function (Ding et al., 2017) and cis-regulatory elements responsible for regulating transcription  
153 of the subgenomic RNA (Ding, Nimgaonkar, et al., 2018), we lentivirally expressed a wild-type  
154 (wt), pol (-), or C483A version of ORF1, or the pPCP alone in HepG2C3A human hepatoma  
155 cells (**Figure 2A**). These cells were subsequently transfected with *in vitro* transcribed RNA from  
156 Kernow C1/p6 Gluc wt, pol (-), or C483A genome (**Figure 2A**). Gluc activity as a measure of the  
157 efficiency for HEV replication was quantified in the culture supernatants over 4 days post RNA  
158 transfection. Notably, when the mock signal fold change over WT luciferase signal was  
159 examined, cells expressing a mutant form of ORF1 demonstrate a deleterious effect on WT  
160 replicon replication, likely due to competitive inhibitory binding of the mutant protein with the  
161 replicon RNA (**Figure 2B**). Impairments in viral genome replication due to the pol (-) or C483A  
162 mutations could be rescued *in trans* by expression of WT ORF1 near to levels of those following  
163 transfection of WT replicon RNA (**Figure 2 D-E**). Of note, expression of the putative PCP failed  
164 to restore replication of Kc1/p6 Gluc C483A suggesting that the functions of this region of ORF1  
165 are not adequately maintained outside of the context of the ORF1 polyprotein. This  
166 transcomplementation platform provides further means to uncouple the putative functions of the  
167 pPCP, e.g. polyprotein processing or modulation of the host cellular environment, from viral  
168 genome replication.

169 **Point mutations of highly conserved cysteines and alanine scanning mutagenesis within**  
170 **the putative PCP identifies residues and regions indispensable for viral replication.** We  
171 examined the putative PCP sequences across all 8 known HEV genotypes (**Supplementary**  
172 **Figure 1**), and noticed an octa-cysteine motif highly conserved across all HEV genotypes  
173 (**Figure 3A**). Previous work has shown the core hexa-cysteine motif encompassing cysteines  
174 457-483 in SAR55 genotype 1 HEV were necessary for viral replication (Parvez, 2013). To  
175 determine the necessity of each cysteine to the viral replication cycle in the Kc1/p6 strain of  
176 HEV, we mutated each in turn to alanine within the Kc1/p6 Gluc reporter replicon and quantified  
177 the luciferase signal 4 d.p.t. (**Figure 3B**). We noticed that of the 8 conserved cysteines, only the  
178 core 6 that form a CxC[x<sub>11</sub>]CC[x<sub>8</sub>]CxC hexa-cysteine motif are vital for viral replication, with the  
179 first cysteine at position C434 being completely dispensable for replication, and the final  
180 cysteine at position C563 having a slight detriment to replication when mutated to alanine  
181 (**Figure 3B**).

182 To determine more broadly which other regions of the HEV pPCP are indispensable for viral  
183 replication, we sought to conduct an unbiased genetic mutagenesis screen of the entire putative  
184 PCP region of 160 amino acids. Site-directed triplicate alanine scanning mutagenesis was  
185 conducted across the entirety of the HEV pPCP, identifying several triplicates that offer pro-viral  
186 activity, as well as identifying the majority of triplicates vital for viral replicative fitness (**Figure**  
187 **3C**). Notably, triplicates containing any of the conserved cysteines, as well as the variable  
188 amino acid at position 590 were indispensable for viral replication, despite point mutations at  
189 positions C434 and C563 being tolerated (**Figure 3B**). Additionally, the amino acid stretches 55-  
190 63 and 73-81 directly downstream of the hexa-cysteine motif tolerate mutagenesis quite well,  
191 suggesting a possible structural/linker function of these amino acids; these triplicates are not  
192 highly conserved across the eight HEV genotypes (**Supplementary Figure 1**).

193 **Hexa-cysteine motif (CxC[x]<sub>11</sub>CC[x]<sub>8</sub>CxC) within HEV Kernow putative PCP vital for viral**  
194 **replication shares homology with host divalent metal ion binding proteins.** Interrogating  
195 the results of point mutations to the 8 highly conserved cysteines within the putative PCP led us  
196 to further bioinformatic analysis to determine the function of the vital hexa-cysteine motif.  
197 Utilizing motif searches with ScanProSite (de Castro et al., 2006) and TrEMBLE(Bairoch &

198 Apweiler, 2000; Boeckmann et al., 2003; O'Donovan et al., 2002), we began by searching for a  
199 relaxed expression of the HEV hexa-cysteine motif (CxC[x]<sub>3-20</sub>CC[x]<sub>3-20</sub>CxC, where x can be any  
200 amino acid). From this analysis over 33,000 proteins emerged. To further refine our approach,  
201 we identified proteins that matched the HEV CxC motif exactly (CxC[x]<sub>11</sub>CC[x]<sub>8</sub>CxC, hereafter  
202 referred to as the HEV motif); however, all of the protein hits that emerged are as of now  
203 uncharacterized, offering little insight as to the function of this motif (**Supplementary Figure**  
204 **2A**). Relaxing the criteria to (+/-) 1 for each of the stretches of [x] (CxC[x]<sub>(10-12)</sub>CC[x]<sub>(7-9)</sub>CxC)  
205 brought forth 26 proteins with known functions (**Supplementary Figure 2A**), enriched for  
206 proteins with divalent metal ion binding activity (**Supplementary Figure 2B**). We hypothesized  
207 that this region within the pPCP is necessary for metal ion coordination.

208 **Structural prediction models of HEV pPCP demonstrates low-confidence scores,**  
209 **suggesting lack of highly ordered secondary structure.** The dearth of structural information  
210 of the HEV ORF1 protein has hampered the complete understanding of the viral replication  
211 cycle. To glean more information about the domain organization and protein folding of HEV  
212 ORF1, we turned to AlphaFold(Jumper et al., 2021) to predict the structure of ORF1. The  
213 complete sequence of HEV ORF1 was fed into the AlphaFold algorithm, and the best ranked  
214 model (**Figure 4A**) was chosen for further analysis. To gain confidence in the best ranked  
215 model, we analyzed the AlphaFold prediction in several ways. First, we analyzed the confidence  
216 levels produced by AlphaFold (pLDDT score) for each residue across the ORF1 structure  
217 prediction (**Figure 4 B-C**). This analysis revealed varying levels of confidence throughout the  
218 entirety of ORF1, and importantly, low confidence throughout much of the pPCP. We further  
219 looked at how AlphaFold predicts the pPCP outside of the context of ORF1 and found that the  
220 pLDDT averages are very similar (**Figure 4C**), with the pPCP alone averaging a pLDDT score  
221 of 65.92, and the pPCP within the context of ORF1 scoring a slightly better average of 66.05.  
222 Second, we tested how closely the AlphaFold prediction aligned with two separate solved  
223 structures of fragments of HEV ORF1, as well as the known solved structures of the macro  
224 domains in other distantly related viruses. To this end, we used a combinatorial approach of  
225 sequence based alignments with structure based alignments to gain the most accurate distance  
226 matrices of relevant atomic coordinates within each alignment of regions of ORF1 and the  
227 corresponding known structures (approach reviewed in(Carpentier & Chomilier, 2019)). To  
228 accomplish this, we took the ORF1 structure prediction, and using the tool TM-Align(Zhang &  
229 Skolnick, 2005) we aligned: a region of HEV ORF1 that spans parts of the putative PCP and  
230 HVR (AAs 510-691) of the SAR55 strain of genotype 1 HEV (PDB: 6NU9)(Proudfoot et al.,  
231 2019), the amphipathic “thumb” of HEV genotype 3 strain 83-2-27 RNA dependent RNA  
232 Polymerase (amino acids 1628-1647; ORF1 kc1/p6 residues 1684-1709)(Oechslin et al., 2022),  
233 and the macro domains of Sindbis virus (SINV amino acids 1342 – 1509 of PDB: 4GUA)(Shin et  
234 al., 2012), and Chikungunya virus (CHIKV) (PDB: 3GPG)(Malet et al., 2009), (**Supplementary**  
235 **Figure 3A-C**, respectively).

236 Alignment of 6NU9 with the corresponding region of Kc1/p6 ORF1 shows high local alignment  
237 identity, with the average distance of this superimposition aligning at 0.67 Å (**Supplementary**  
238 **Figure 3A**). Alignment of the amphipathic RdRp “thumb” domain similarly shows incredibly high  
239 local alignment identity with a 0.48 Å average differential (**Supplementary Figure 3B**).  
240 Understandably, alignment of the macrodomains of SINV and CHIKV also show high local  
241 alignment, though less robust than that of other HEV strains to Kc1/p6 ORF1 of HEV. Notably,  
242 the HEV macro domain and the macro domains of SINV and CHIKV share little amino acid  
243 similarity and identity, with the Kc1/p6 HEV macro domain sharing only 36.45% sequence  
244 identity and 54.21% sequence similarity with the SINV macro domain, and sharing only 35.58%  
245 sequence identity and 56.73% sequence similarity with the CHIKV macrodomain  
246 (**Supplementary Figure 4**). Despite this sequence disparity, these viral macrodomains share

247 high structural identity, with the ORF1 and SINV superimposition aligning at 1.79 Å on average,  
248 and similarly, aligning with the CHIKV superimposition at 1.89 Å on average (**Supplementary**  
249 **Figure 3C**).

250  
251 Importantly, these aforementioned highly ordered secondary structures within HEV ORF1 all  
252 exhibit much higher AlphaFold pLDDT scores on average than the whole of the pPCP (**Figure**  
253 **4C**). This prompts several considerations: 1.) AlphaFold is not able to accurately predict the  
254 amino acid backbone or side chains of the pPCP with a high amount of confidence. 2.) If this  
255 region were a protease domain, it would likely have a highly ordered, and readily predicted  
256 secondary structure. To test this latter point, we analyzed AlphaFold's ability to accurately  
257 predict the structure of a known protease, which it does very well. When comparing the known  
258 structure of the hepatitis A virus (HAV) 3C protease (Bergmann et al., 1999) with the AlphaFold  
259 prediction, they align with an average superimposition distance of 1.03 Å (**Supplementary**  
260 **Figure 3D**). Interestingly, AlphaFold was able to fold the HAV protease with very high  
261 confidence, with an average pLDDT score of 97.14 across the entirety of prediction, giving high  
262 confidence of interpretation to both the amino acid backbones and side chain chains  
263 (**Supplementary Figure 3D**). Due to the low pLDDT score of the pPCP, we visualized the  
264 predicted folding of this region by color-coding the outcomes of the alanine-scanning  
265 mutagenesis to better understand whether the secondary structures predicted by AlphaFold  
266 stand. We found that the majority of the predicted alpha-helices and beta-sheets do not tolerate  
267 mutations well, while the majority of the tolerated mutants lie within predicted regions of disorder  
268 (**Figure 4D**), (**Supplementary Movie 1**). Taken together, these results suggest the structure  
269 predictions of HEV ORF1 by AlphaFold demonstrate high confidence within known regions that  
270 possess a high level of secondary structure. AlphaFold is able to predict the structure of a  
271 known viral protease with high confidence, suggesting further that the HEV pPCP domain does  
272 not possess the necessary secondary structure of a protease. This prediction of the HEV ORF1  
273 pPCP is bolstered by the enrichment of replication tolerant triplets from the alanine scanning  
274 mutagenesis to preferentially localize to predicted areas of disorder (**Figure 4D**),  
275 (**Supplementary Movie 1**), suggesting as a whole that the pPCP does not fold as a protease  
276 with a catalytic pocket.

277 **Structural prediction models suggest that mutating cysteines within putative PCP**  
278 **disrupts divalent ion coordination pockets and novel domain-domain interaction with**  
279 **upstream Y-domain.** Upon demonstrating that mutations within the putative PCP domain  
280 prevent HEV from replicating, we sought to further elucidate potential mechanisms by which this  
281 deficiency occurs. Utilizing the structural predictions of HEV ORF1 generated with AlphaFold,  
282 we began by analyzing the predicted folding structure of WT ORF1, and two of the point  
283 mutants within the putative PCP: C483A and C563A (chosen based on the heterogeneity of  
284 their phenotypes). C483A is fully replication deficient, while C563A is blunted in replication at  
285 two orders of magnitude lower than WT four days post transfection (**Figure 3B**).

286 We next fed the sequences of the C483A and C563A mutant sequences of ORF1 into the  
287 AlphaFold algorithm. Upon inspection of the best ranked models for each of these versions of  
288 ORF1 (WT, C483A, C563A), we noticed a novel pseudo-zinc-finger formed by the amino acids  
289 underlying the HEV hexa-cysteine motif, despite the low pLDDT scores within this region  
290 (**Figure 5A**, left) (**Supplementary Movies 2-4**, respectively). Mutation of C483A, but not  
291 C563A is predicted to disrupt the molecular architecture of this pseudo-zinc-finger, however  
292 mutation of either causes a relaxation of several predicted bond lengths to beyond biological  
293 relevance (Zheng et al., 2008) (**Supplementary Table 2**, **Supplementary Movies 2-3**).  
294 Cysteine side chain residues at positions 457 and 459 at the end of the predicted beta sheet  
295 leading into the pseudo-zinc-finger were shown to be projecting into inter-domain space. These

296 residues are predicted to form a potential tetrahedral divalent ion binding pocket (Laitaoja et al.,  
297 2013) with D248 and H249 in the upstream Y-domain (**Figure 5A**, middle), which had pLDDT  
298 scores of 82.99 and 87.67, respectively, giving high confidence in the predicted location of the  
299 amino acid backbones and potentially their side-chains (**Figure 4C**). Cysteine, histidine, and  
300 aspartic acid residues are well known to bind divalent metal ions and form tetrahedral geometry  
301 (Laitaoja et al., 2013; Zheng et al., 2008). To further test whether this predicted interaction  
302 between C457, C459, D248, and H249 was vital to viral replication, we mutated either D248 or  
303 H249 to alanine in the Kc1/p6 Gluc replicon and quantified Gluc expression 4 days post RNA  
304 transfection. D248 was dispensable for viral replication while H249 is not (**Supplementary**  
305 **Figure 5**); D248 is variable across all 8 known HEV genotypes while H249 is highly conserved  
306 (**Figure 5B**). This observation led us to inquire as to what the disruptions these point mutations  
307 could have on ORF1 globally. We noticed that by comparing the structure of ORF1 WT  
308 (**Supplementary Movie 2**) next to the mutants while highlighting domains of ORF1 with well-  
309 defined functions such as the methyltransferase, helicase, and RdRp, structural differences  
310 emerge. Mutating C483A, C563A, or H249A are predicted to cause regions of the  
311 methyltransferase, helicase, and RdRp to reconfigure (**Figure 5A**, right) (**Supplementary**  
312 **Movies 3, 4, and 6, respectively**). Further, mutating C563A, D248A, or H249A causes a  
313 predicted membrane association domain that is exposed in the WT ORF1 protein to become  
314 buried, possibly preventing the association with intracellular membranes and  
315 preventing/hindering the formation of a replication compartment (Metzger et al., 2022;  
316 Szkolnicka et al., 2019) (**Supplementary Movies 4, 5, and 6, respectively**). Taken together,  
317 these results suggest that by interfering with divalent metal ion binding domains within the  
318 putative PCP, structural domains vital to viral replication form aberrantly, and prevent HEV  
319 ORF1 from efficiently replicating.

320 **HEV hexa-cysteine motif coordinates biologically relevant divalent metal ions.** Outside of  
321 our own analysis that suggests the putative PCP of HEV ORF1 has metal ion binding activity,  
322 other groups have identified regions within ORF1 predicted to harbor  $\text{Ca}^{2+}$  and  $\text{Zn}^{2+}$  ion binding  
323 sites (Parvez & Khan, 2014; Proudfoot et al., 2019). However, the low abundance of ORF1 protein within  
324 infected cells and the lack of well-characterized ORF1 specific antibodies has hampered  
325 attempts at purifying a replication competent ORF1 protein. This barrier has only recently been  
326 overcome when tolerant epitope tag insertion sites were discovered within the HVR region of  
327 ORF1 and characterized (Metzger et al., 2022; Szkolnicka et al., 2019).

328 Utilizing an HA-tag insertion site flanked on either side by the linker sequence (AAAPG-HA-  
329 AAPG, hereafter referred to as HA-tagged) within the HVR of ORF1 (Szkolnicka et al., 2019), we  
330 generated an overexpression system of WT or mutant HA-tagged ORF1 via lentiviral  
331 transduction of Huh7 human hepatoma cells (**Figure 6A**). To determine if the mutations at  
332 C483A, C563A, D248A or H249A affected ORF1's ability to bind divalent ions, we immune  
333 purified each protein via the HA-tag mediated immunopurification (**Figure 6B**), and subjected  
334 each purified protein eluant to inductively-coupled plasma mass spectrometry (ICP-MS) (**Figure**  
335 **6C**). Element signatures indicate that while each mutant is heterogenous with each other in  
336 binding activity for most divalent ions, they all bind less  $\text{Zn}^{2+}$  than WT. These results suggest  
337 that divalent ion binding capacity likely affects proper structural confirmation of ORF1 leading to  
338 differential replication capacity based on mutation position.

339 **Loss of divalent ion binding activity leads to differences in subcellular localization of**  
340 **HEV ORF1.** To determine whether the differential in divalent ion binding potential due to  
341 mutations within the putative PCP or upstream Y-domain is responsible for a loss of subcellular  
342 localization, we turned to confocal microscopy. Cells bicistronically expressing zsGreen as a



343 marker of transduction as well as WT ORF1 without an epitope tag, WT ORF1-HA-tagged,  
344 C483A-HA-tagged, C563A-HA-tagged, D248A-HA-tagged, or H249A-HA-tagged were imaged  
345 for zsGreen, and using antibodies against the HA-tag and nuclei were imaged to visualize ORF1  
346 subcellular localization patterning. Cells expressing ORF1 WT-HA showed significant  
347 expression of ORF1 in both the cytoplasm and nucleus as previously reported (Metzger et al.,  
348 2022), and showed many puncta aggregates throughout the cytoplasm (**Figure 7**). In contrast,  
349 the replication deficient ORF1 C483A-HA expressing cells lost the ability for ORF1 to localize to  
350 the nucleus and was found dispersed throughout the cytoplasm (**Figure 7**). Cells expressing the  
351 C563A-HA mutant of ORF1 showed similar localization patterns to ORF1 WT-HA, with puncta  
352 forming in the cytoplasm, and maintaining the ability to localize to the nucleus (**Figure 7**).

353 Cells expressing mutations in the novel upstream interacting Y-domain were also varied in their  
354 localization when compared to ORF1 WT-HA. Replication competent ORF1 D248A-HA, like  
355 C563A-HA, shared localization patterns with ORF1 WT-HA, forming cytoplasmic puncta and  
356 localizing within the nucleus (**Figure 7**). In contrast, replication deficient ORF1 H249A-HA  
357 showed very disperse cytoplasmic localization, no aggregate formation, and a lesser ability to  
358 localize to the nucleus (**Figure 7**). Taken together with the replication data of these epitope-  
359 tagged ORF1 mutants (**Supplementary Figure 5**), localization of ORF1 seems to correlate with  
360 replicative capacity, with nuclear localization being lost or diminished in mutants that cannot  
361 replicate (C483A-HA, H249A-HA), and mutants able to establish replication (C563A-HA,  
362 D248A-HA) share localization patterns with ORF1 WT-HA. These results shed light on a  
363 potential novel mechanism by which mutants in the putative PCP and upstream Y-domain  
364 interfere with HEV's replication cycle.

## 365 **Discussion:**

366 With the advent of reporter replicons for the HEV replicase in the early 2000s (Emerson et al.,  
367 2004), research into the functional domains of ORF1 become possible. Perturbations to the viral  
368 replicase could be assessed qualitatively and be quantified for the first time, allowing  
369 researchers to begin dissecting regions of ORF1 necessary to viral replication. In our study, we  
370 first sought to determine whether our results with the Kc1/p6 genotype 3 HEV were in  
371 agreement with previous results that utilized a GFP reporter replicon of HEV genotype 1 SAR55  
372 strain in S10-3 cells (Parvez, 2013). We were able to demonstrate that mutations in the core six  
373 of the eight highly conserved cysteines within the pPCP, as well as the heterogenous residue at  
374 position 590, renders Kc1/p6 HEV replication incompetent. We were also able to show that the  
375 putative catalytic cysteine in the HEV pPCP renders HEV in three additional genotypes  
376 replication incompetent. Taking this analysis further, we demonstrate that the dysfunction in our  
377 reporter replicon is likely at the protein level, due to the replicon being able to tolerate an  
378 alternate codon for cysteine, and none of the codons for alanine, suggesting a conserved need  
379 of this amino acid residue for HEV.

380 Of all the domains within ORF1, the functions of the putative PCP remain the most debated.  
381 Though evidence for and against proteolytic cleavage continues to mount on both sides, it is  
382 important to take the scientific results, as well as the functionality of the ORF1 protein, in  
383 context. Our data in this study has shown that the pPCP of ORF1 cannot function outside of the  
384 context of the full length protein, which is rather uncommon for many RNA viruses such as  
385 hepatitis A virus (Lemon et al., 1991), HCV (Yang et al., 2000), and flaviviruses such as Zika  
386 virus (Ding, Gaska, et al., 2018). While most characterized (+) ssRNA viruses rely on proteases  
387 to liberate individual gene products from their encoded polyprotein, HEV may be an exception.  
388 While it remains conceivable that host proteases may post-translationally process ORF1, there

389 is rather limited evidence that subunits of ORF1 itself harbors proteolytic activity. Furthermore, if  
390 processing were to occur, it is likely that only a small fraction of ORF1 might be cleaved, as  
391 suggested previously (Metzger et al., 2022); however, the smaller species of ORF1 in the  
392 previously cited study were unable to be characterized by mass spectrometric analysis, leaving  
393 the processing of ORF1 still subject to debate. The inability for the putative HEV PCP to act  
394 outside of the context of the full length ORF1 protein suggests that it has some orthogonal  
395 activity, and that HEV ORF1 likely functions as one large multi-domain protein.

396 To take an unbiased approach to analyzing the putative PCP domain, we attempted to identify  
397 motifs within the region that were either vital or dispensable to viral replication. To this end, we  
398 conducted an alanine scanning mutagenesis screen in triplets across the entire viral region, and  
399 found that while the majority of the region is needed for replication, there were 11/54 triplets that  
400 were able to replicate at near WT levels. Several of these triplets fell very near to the HEV  
401 (CxC<sub>[x<sub>11</sub>]</sub>CC<sub>[X<sub>8</sub>]</sub>CxC) motif within the putative PCP; we aimed to identify the potential function of  
402 this region, as well as obtain as much structural information. To this end, we were able to  
403 identify proteins with known functions that shared close homology to the HEV motif, and found  
404 that these proteins were enriched for metal ion binding or for disulfide bond formation,  
405 suggesting a structural activity rather than a catalytic one. We then capitalized on the power of  
406 AlphaFold to gain structural insights into the nature of this vital region. When looking at the  
407 structure predictions of the HEV motif, we noticed a striking pseudo-zinc finger formation, as  
408 well as a tetrahedral binding pocket canonically associated with Zn<sup>2+</sup> binding with two residues  
409 in the upstream Y-domain. When mutations to conserved cysteines or the aspartic acid or  
410 histidine in the upstream Y-domain were modeled, several changes were noticeable: first, for the two  
411 mutants that are rendered replication incompetent (C483A, H249A), the alpha-helix of the  
412 pseudo zinc-finger is disrupted. Further, several bond lengths between potential coordinating  
413 residues are relaxed to beyond biological relevance. Further, a putative membrane contact site  
414 predicted in (Parvez, 2017) becomes buried in these mutants, hinting at a potential mechanism  
415 behind the loss of replicative ability. Many RNA viruses are known to adopt a similar strategy of  
416 metal ion coordination to carry out necessary functions (Chasapis, 2018). For instance, HCV  
417 utilizes a metalloprotein in its replicase, the nonstructural protein NS5A (Tellinghuisen et al.,  
418 2004; Tellinghuisen et al., 2005); HCV utilizes four cysteines within a C<sub>[x]<sub>17</sub></sub>CxC<sub>[x]<sub>20</sub></sub>C motif,  
419 conserved among *Hepacivirus* and *Pestivirus* genera, for Zn<sup>2+</sup> coordination and proper function  
420 of the HCV replicase machinery.

421 To determine whether mutants in these predicted metal ion binding motifs actually led to a  
422 decrease in ion binding activity, we needed to be able to purify ORF1 protein for subsequent  
423 analyses. One of the many difficulties in interrogating HEV ORF1 is its low expression level in  
424 infected cells, as well as the lack of a well-characterized commercial antibody (Lenggenhager et  
425 al., 2017). However, recent identification of sites within ORF1 that tolerate epitope tags without  
426 sacrificing viral replicative capacity have opened up new avenues for researchers to investigate  
427 ORF1, and the putative PCP, more robustly and critically. Utilizing one such insertion site, we  
428 were able to purify WT and mutant ORF1 proteins and subject them to ICP-MS. We found that  
429 across all mutants, none were able to bind zinc ion species as well as the WT ORF1, lending  
430 validity to our structural hypotheses generated with AlphaFold. We then determined whether the  
431 predicted burying of the putative membrane contact site in the replication deficient mutants  
432 affected ORF1 localization within cells expressing the epitope tagged ORF1. Utilizing confocal  
433 microscopy, we were able to demonstrate that the C483A mutation loses ORF1 nuclear  
434 localization, while the H249A mutation decreases nuclear localization of ORF1, and prevents  
435 puncta formation throughout the cytoplasm, which lies in stark contrast to WT ORF1. Taken  
436 together, with the advent of new tools such as reporter replicons for HEV, AlphaFold, and  
437 tolerable epitope insertion sites discovered within ORF1, our bioinformatic and genetic analyses

438 have been able to go far beyond previous attempts at predicting functional domains within  
439 ORF1: we have been able to demonstrate a powerful, iterative pipeline of testing A.I. driven  
440 predictions via hypothesis generation and testing with the tools at our disposal. We have been  
441 able to demonstrate a novel domain-domain interaction between the upstream Y-domain and  
442 the metal-coordinating structural domain of HEV, previously (and incorrectly called the PCP),  
443 and we suggest a change in the accepted nomenclature of this vital, and enigmatic viral region  
444 to reflect this function.

445

## 446 **Materials and Methods:**

### 447 **Cell lines and cell culture.**

448 HepG2C3A cells (ATCC, CRL-10741) Huh7, and Huh7.5 cells (kindly provided by Charles Rice,  
449 The Rockefeller University) were maintained in Dulbecco's modified Eagle medium (DMEM)  
450 (Gibco, NY, USA) supplemented with 10% (vol/vol) fetal bovine serum (FBS), 50 IU/ml penicillin  
451 and streptomycin, in a humidified 5% (vol/vol) CO<sub>2</sub> incubator at 37°C.

452

### 453 **Multiple sequence alignment.**

454 The following hepatitis E virus (HEV) strains were used for sequence alignment: GenBank  
455 identifiers [IDs] or accession numbers [M73218](#) (genotype 1a, Burma strain), [M74506](#) (2a,  
456 Mex), [JQ679013.1](#) (3, Kernow-C1/p6), [AB197673](#) (4a), [AB573435](#) (5a), [AB856243](#) (6,  
457 wbJNN\_13), [KJ496144](#) (7, 180C), and [KX387866](#) (8, 48XJ). M73218 (genotype 1a, Burma  
458 strain) was used as the reference strain for numbering. Sequence alignments were conducted  
459 with the SnapGene software (from Insightful Science; available at [snapgene.com](#)) using the  
460 multiple sequence alignment tool. HEV genotype alignments were conducted using CLUSTALW  
461 alignment algorithms embedded within the software.

462 Alignment of the HEV macro domain with the macrodomain of SINV (PDB: 4GUA) and CHIKV  
463 (PDB: 3GPG) were conducted with the SnapGene software (from Insightful Science; available  
464 at [snapgene.com](#)) using multiple sequence alignment tool with the local alignment Smith-  
465 Waterman algorithm.

466

### 467 **Hexa-cysteine motif bioinformatics.**

468 The HEV hexa-cysteine motif CxC[X]<sub>11</sub>CC[X]<sub>8</sub>CxC motif sequence identified was searched using  
469 ScanProsite (de Castro et al., 2006) on all UniProtKB/Swiss-Prot (release 2020\_02 of 22-Apr-20:  
470 562253 entries), UniProtKB/TrEMBL (release 2020\_02 of 22-Apr-20: 0 entries) databases  
471 sequences using the regular expression [C-X-C-X(3,20)-C-C-X(3,20)-C-X-C]. The regular  
472 expression allows from 3 up to 20 residues in the 2 long stretches of amino acid residues where  
473 X can be any amino acid shown by previous bioinformatic analysis and sequence alignments  
474 across HEV genotypes (**Supplementary Figure 1A**). The search produced 429 hits in  
475 SwissProt and 32,764 hits in TrEMBL. We further refined the regular expression [C-X-C-X(11)-  
476 C-C-X(8)-C-X-C to match the HEV hexa-cysteine motif exactly, and produced 25 protein hits  
477 with no known function. We refined this search yet again to include the regular expression [C-X-  
478 C-X(10,12)-C-C-X(7,9)-C-X-C, which allows (+/-) one residue in each long stretch of amino  
479 acids where X can be any amino acid, and found 26 proteins hits with known functions  
480 (**Supplementary Figure 2**) and were used to predict the function of the motif sequence.

481

### 482 **ORF1 Protein Structure Predictions.**

483 FASTA files of each species of ORF1 (WT or mutants) were submitted to the AlphaFold  
484 algorithm (Jumper et al., 2021) (DeepMind, United Kingdom, v. 2.0.0--model preset=monomer))

485 (or in the case of the HAV 3C protease, v. 2.1.1--model preset=monomer)) run on the Princeton  
486 Research Computing DELLA Cluster at Princeton University. 5 models of each protein  
487 prediction were produced, and the best ranked model for each was used for subsequent  
488 analysis.

489

#### 490 **Atomic Distance Calculations.**

491 Atomic distance calculations between the HEV ORF1 structure predications produced via  
492 AlphaFold (WT or point mutants) and known structures within ORF1 or distantly related viral  
493 macrodomains were done via the structure based alignment tool TM-Align(Zhang & Skolnick,  
494 2005). Briefly, the known crystal structure of a region of the ORF1 putative PCP/HVR (PDB:  
495 6NU9(Proudfoot et al., 2019)) was directly fed into the TM-Align software. The amphipathic  
496 “thumb” of the RdRp solved via nuclear magnetic resonance (NMR)(Oechslin et al., 2022),  
497 encountered a multi-mapping problem due to its alpha-helical nature and short amino acid  
498 sequence when fed directly into TM-Align; to generate the correct distance plot, the AlphaFold  
499 ORF1 prediction was trimmed of amino acids not corresponding to the region of the amphipathic  
500 RdRp thumb domain (Kc1/p6 AAs 1690-1708) utilizing UCSF Chimera. The trimmed ORF1  
501 structure was aligned with the amphipathic thumb domain PDB, kindly provided by Jérôme  
502 Gouttenoire, using TM-Align. The distance plot generated between the AlphaFold ORF1  
503 prediction and the macro domain of SINV was done by trimming a single chain of the trimer to  
504 remove amino acids outside the macrodomain of the SINV prediction P23pro-zbd(Shin et al.,  
505 2012) (utilizing AAs 1342 – 1509 of PDB: 4GUA) and aligning it to the ORF1 prediction using  
506 TM-Align. The CHIKV macrodomain PDB file 3GPG(Malet et al., 2009) was edited to remove  
507 the three additional chains comprising the hetero-tetramer and aligned with the ORF1 prediction  
508

509

#### 509 **Molecular graphics and analysis.**

510 Molecular graphics and analyses performed with UCSF Chimera, developed by the Resource  
511 for Biocomputing, Visualization, and Informatics at the University of California, San Francisco,  
512 with support from NIH P41-GM103311 (Pettersen et al., 2004).

513 Note: Kernow c1/p6 strain contains an s17 insertion within the HVR, so amino acid positions  
514 shift downstream of this insertion at amino acids 751-806.

515

#### 516 **Plasmid construction.**

517 To construct lentiviral constructs encoding ORF1 of Kernow C1/p6 (GenBank accession  
518 number JQ679013), the Kernow C1/p6 ORF1 cDNA was amplified by PCR from a plasmid  
519 encoding the full-length (FL) infectious HEV clone Kernow C1/p6 (kindly provided by Suzanne  
520 Emerson, NIH) and then cloned into pLVX-IRES-zsGreen1 vector using an In-Fusion HD  
521 cloning kit (Clontech, Mountain View, CA, USA). The GAD mutant of ORF1 inactivating the  
522 polymerase was generated by QuikChange (Stratagene) site-directed mutagenesis. The HEV  
523 Kernow-C1 p6-Gluc (Shukla et al., 2011) and pSAR55-GLuc were kindly provided by Suzanne  
524 Emerson and Patricia Farci. pGEM-9zf-pSHEV3 and pGEM-7Zf(-)-TW6196E encoding the  
525 infectious pSHEV3 (gt 3) and TW6196 (gt 4) clone, respectively were gifts from X.J. Meng. Site-  
526 directed mutagenesis of these plasmids for C483A or Pol(-) mutants were obtained with the  
527 QuikChange kit (Stratagene) using primers listed in **Supplementary Table 1**. HEV Kernow-C1  
528 p6-Gluc was used to generate the triplicate mutants for the alanine scanning mutagenesis of the  
529 entire pPCP domain, as well as the C434A, C457A, C459A, C471A, C472A, C481A, C483A,  
530 C563A, C483S, C483C (TGT), Y590A, Y590F, C483A-Y590A, C483G-Y590L, C483A (GCT),  
531 C483A (GCA), C483A (GCG), D248A, and H249A point mutants by QuikChange XL site-  
532 directed mutagenesis kit (Stratagene, La Jolla, CA). All primers used for site-directed  
533 mutagenesis can be found in (**Supplementary Table 1**). AAAPG-HA tag-AAAPG insert was  
534 generated by amplifying out the HA tag sequence from pLVX ORF2-HA using primers listed in  
535 (**Supplementary table 1**). pLVX Kernow C1/p6 ORF1 AAAPG-HA tag-AAAPG IRES zsGreen

536 was generated via XhoI and XbaI digestion of pLVX IRES zsGreen plasmid and In-Fusion HD  
537 cloning of ORF1 AAAPG-HA tag-AAAPG from p6/BSR-2A-ZsGreen AAAPG-HA tag-AAAPG  
538 HVR using primers listed in **Supplementary Table 1**. Overexpression constructs for ORF1  
539 AAAPG-HA tag-AAAPG point mutants C483A, C563A, D248A, and H249A were generated from  
540 the parent pLVX Kernow C1/p6 ORF1AAAPG-Ha tag-AAAPG IRES zsGreen construct via  
541 QuikChange XL site-directed mutagenesis kit (Stratagene, La Jolla, CA). using primers listed in  
542 (**Supplementary Table 1**).

543

#### 544 **Generation of HEV reporter genomes.**

545 The generation of p6/BSR-2A-ZsGreen was described previously (Nimgaonkar et al., 2021).  
546 The generation of pSK-SAR55-Gluc, pGEM-9Zf-pSHEV3-Gluc, and pGEM-7Zf(-)-TW6196E-  
547 Gluc reporter constructs were described previously (Ding, Nimgaonkar, et al., 2018). Generation  
548 of pSK-Kernow AAAPG-HA tag-AAAPG HVR GLuc was conducted via PCR linearization of pSK  
549 Kernow WT GLuc and In-Fusion HD cloning of AAAPG-HA tag-AAAPG cloned out of p6/BSR-  
550 2A-ZsGreen AAAPG-HA tag-AAAPG HVR using primers listed in **Supplementary table 1**.  
551 All DNA fragments were cloned into the respective vectors using an In-Fusion HD cloning kit  
552 (Clontech, Mountain View, CA, USA). All constructs or primers used to construct the HEV  
553 reporter genomes in **Supplementary Table 1** have been validated through Sanger sequencing  
554 and are available upon request.

555

#### 556 ***In vitro* transcription assay and viral RNA transfection.**

557 HEV Kernow-C1 p6-Gluc, HEV Kernow-C1 p6 C483A-Gluc, HEV Kernow-C1 p6 GAD-Gluc and  
558 all Kernow point mutant and alanine scanning triplite construct plasmids were linearized by MluI.  
559 pSAR55-Gluc, pSAR55 C483A-Gluc, and pSAR55 GAD-Gluc were linearized by BglIII, pGEM-  
560 9Zf-pSHEV3-Gluc, pGEM-9Zf-pSHEV3 C483A-Gluc, and pGEM-9Zf-pSHEV3 GAD-Gluc were  
561 linearized by XbaI, and pGEM-7Zf(-)-TW6196E-Gluc, pGEM-7Zf(-)-TW6196E C483A-Gluc, and  
562 pGEM-7Zf(-)-TW6196E GAD-Gluc were linearized by SpeI. All capped viral RNA was *in vitro*  
563 transcribed from the corresponding linearized plasmid using the HiScribe T7 antireverse cap  
564 analog (ARCA) mRNA kit (New England Biolabs, Ipswich, MA) according to the manufacturer's  
565 protocol. *In vitro* transcribed viral RNA was purified by LiCl precipitation following DNase1  
566 digestion. *In vitro* transcribed viral RNA was transfected into HUH7, HUH7.5, or HepG2C3A  
567 cells via the TransIT-mRNA transfection reagent (Mirus Bio LLC, Madison, WI) according to the  
568 manufacturer's instructions.

569

#### 570 ***Gaussia* luciferase assays.**

571 *Gaussia* luciferase activity was determined using Luc-Pair Renilla luciferase HS assay kit  
572 (GeneCopoeia, Rockville, MD). Specifically, 10  $\mu$ l of harvested cell culture medium was added  
573 per well of a 96-well solid white, flat-bottom polystyrene microplate (Corning, NY, USA),  
574 followed by the addition of Renilla luciferase assay substrate according to manufacturer protocol  
575 and the detection of luminescence was performed using a Berthold luminometer (Bad Wildbach,  
576 Germany).

577

#### 578 **Immunopurification of HA-tagged proteins.**

579 Immunopurification of HA tagged proteins for ICP-MS analysis was conducted using the  
580 Pierce™ MS-Compatible Magnetic IP Kit, protein A/G (Thermo Scientific, Waltham,  
581 Massachusetts, Catalog number 90409). 750  $\mu$ g of crude protein lysates of stably expressing  
582 ORF1 cells (WT or mutants) were subjected to each round of IP for subsequent analyses (ICP-  
583 MS or western blot). IP was done with rabbit anti-HA antibody (Cell Signaling Technology,  
584 Danvers, Massachusetts, catalog number C29F4) at a ratio of 1:50 in a laminar flow tissue  
585 culture hood that was sterilized with 70% ethanol and washed with MilliQ water prior to IP. The  
586 IP was conducted according to the manufacturer's instructions, and each collected fraction

587 (crude cell lysate, unbound fraction, and IP eluate) were split into large (80% total volume) and  
588 small (20% total volume) fractions. The large fractions were used for downstream nitric  
589 acid/hydrogen peroxide digestion and ICP-MS analysis, whereas the small fraction was used for  
590 protein quantification and western blot analysis. This was necessary to reduce chances of  
591 contaminating divalent ions being introduced into the sample during non-ICP-MS  
592 characterization.

593

#### 594 **HA-Tagged Immunopurified Protein Digestion.**

595 Eluted protein samples were freeze dried and placed at -80C until nitric acid digestion. Briefly,  
596 protein samples were resuspended in 1.5mL Nitric Acid 67-69% Optima™, for Ultra Trace  
597 Elemental Analysis (Fisher Chemical, Fair Lawn, NJ) in ICP-MS grade Teflon at 80C for 24  
598 hours in a laminar flow hood. 500uL Hydrogen Peroxide (Optima™, Fisher Chemical, Fair Lawn,  
599 NJ) was added to each sample and incubated at 80°C for 24 hours in a laminar flow hood, when  
600 the samples were subsequently dried for 24 hours at 40°C. Fully digested samples were then  
601 resuspended in 1mL 2% (vol/vol) nitric acid dilutes with MilliQ water, diluted in 1x, 2x, and 10x  
602 dilution series, and interrogated via ICP-MS (iCap, Thermo Scientific, Waltham, MA).

603

#### 604 **Inductively coupled plasma mass spectrometry (ICP-MS).**

605 Samples were quantified via a single quadrupole iCap ICP-MS (Thermo Scientific, Waltham,  
606 MA). Briefly, 1mL of 2% (vol/vol) nitric acid running buffer blank was measured, followed by 1mL  
607 per dilution of a dilution series (1x, 2x, 5x, 10x, 50x) of the certified elemental standard 1643F  
608 (National Institute of Standards and Technology, Gaithersburg, MD) to generate an elemental  
609 calibration curve. All elements were measured in standard (STD) mode with the exception of  
610 lithium and iron, which were measured in kinetic (KED) mode to remove unwanted polyatomic  
611 interferences with the argon plasma. Samples were bracketed by an additional blank and  
612 standard curve to monitor instrument drift and ensure consistency throughout each experimental  
613 run. Samples were run via a series of three dilutions per sample, per run. Any measurement for  
614 a sample within the dilution series that fell outside of the dilution series range was excluded  
615 from further analysis. Contamination of trace elements from reagents and MilliQ water was  
616 monitored by processing MilliQ 'samples' through the entire immunopurification and protein  
617 digestion protocol on a run-by-run basis. Any trace metal analyses that was not statistically  
618 different from the MilliQ control 'sample' was excluded from further consideration. Iron and Zinc  
619 ions were binned prior to statistical analysis for ease due to having with multiple isotopes.

620

#### 621 **Immunofluorescence and confocal microscopy.**

622 Naïve HUH7 cells or HUH7 cells expressing ORF1 WT, WT-HA-tag, C483A-HA-tag, C563-HA-  
623 tag, D248A-HA-tag, or H249A-HA-tag were seeded onto separate glass coverslips (#1.5; 10  
624 mm; Thomas Scientific, Swedesboro, NJ) in a 24-well plate at 100,000 cells per well. Two days  
625 post seeding, the cells were fixed with 4% PFA for 15 minutes and subsequently permeabilized  
626 in 0.25% Triton x-100 for 15 minutes. The rabbit anti-HA tag, C29F4 (Cell Signaling Technology,  
627 Danvers, MA) primary antibody was used at a ratio of 1:1000 (V/V), and the AlexaFluor647  
628 (goat anti-rabbit IgG (H+L), ThermoFisher Scientific, Waltham, MA) secondary antibody was  
629 used at a final concentration of 1 ug/mL. All antibodies were diluted with PBS and incubated for  
630 40 minutes at room temperature (RT). Hoechst 33342 (ThermoFisher Scientific, Waltham, MA)  
631 was incubated at a final concentration of 1 ug/mL for 10 minutes at RT. The coverslips were  
632 then mounted onto glass microscopic slides (VWR International, Radnor, PA) with 5 µL of  
633 ProLong gold antifade reagent (ThermoFischer Scientific, Waltham, MA, United States). The  
634 stained samples were imaged using the Nikon A1R-Si microscope (Nikon, Melville, NY) in the  
635 Princeton University Confocal Microscopy Facility. The images were taken at 40x magnification.  
636 Images were then analyzed using Fiji (ImageJ2) image analysis software.

637

638 **Statistical analysis.**

639 All statistical analyses were performed using GraphPad Prism software version 9.3.1. One-way  
640 analysis of variance (ANOVA) with Dunnett's multiple comparison analysis or Brown-Forsythe  
641 one-way analysis of variance (ANOVA) with Dunnett's T3 multiple comparison analysis tests  
642 were used to test for statistical significance of the differences between the different group  
643 parameters in experiments utilizing the *Gaussia* Luciferase reporter replicon. *P* values of less  
644 than 0.05 were considered statistically significant. All data sets were analyzed for and cleaned  
645 of outliers using the ROUT method.

646

647 **Conflict of Interest Statement:**

648 The authors declare no conflicts of interest pertaining to the results reported in this study.

649

650

651

652 **Funding Sources:**

653 Work in the lab is supported by grants from the National Institutes of Health (R01 AI138797,  
654 R01 AI107301, R01 AI146917, R01 AI153236 to A.P.), a Burroughs Wellcome Fund Award for  
655 Investigators in Pathogenesis (#101539 to A.P.) and funding from Princeton University. R.L. and  
656 S.M. were supported by the National Institute of General Medicine Sciences of the National  
657 Institutes of Health under Award Number T32GM007388. This material is based upon work  
658 supported by the National Science Foundation Graduate Research Fellowship under Grant No.  
659 (DGE-2039656) awarded to R.L. The Molecular Biology Flow Cytometry Resource Facility is  
660 partially supported by the Cancer Institute of New Jersey Cancer Center Support grant  
661 (P30CA072720).

662

663 **Acknowledgments:**

664 We kindly thank Susan Emerson and Patricia Farci (NIAID) for providing us with the pSK  
665 SAR55, pBSK(+) Kc1 ORF1 WT GLuc plasmid, X.J. Meng (Virginia-Maryland College of  
666 Veterinary Medicine) for providing us the plasmids pGEM-9zf-pSHEV3 and pGEM-7Zf(-)-  
667 TW6196E encoding the infectious pSHEV3 (gt 3) and TW6196 (gt 4) clone, respectively. HEV  
668 ORF1 RNA dependent RNA Polymerase structural data was kindly provided by Jérôme  
669 Gouttenoire. We would also like to thank Christina DeCoste and Katherine Rittenbach in the  
670 Molecular Biology flow cytometry core facility and Dr. Gary Laevsky and the Molecular Biology  
671 Confocal Microscopy Facility which is a Nikon Center of Excellence for their excellent technical  
672 support. We further thank Dr. Frederick Hughson for indispensable advice and expertise, as well  
673 as Jaden Shirkey and Kevin DAmico of the Hughson lab, and all members of the Ploss lab for  
674 critical discussions and comments throughout experimentation and preparation of the  
675 manuscript.

676

677 **Author Contributions:**

678 This project was conceived by R.L. and A.P. All genetic experiments were performed by R.L.  
679 Bioinformatic analyses were performed by R.L. and A.B. ICP-MS experiments were designed by  
680 R.L., S.G, A.P., and J.H., and were performed by. R.L. and S.G. ICP-MS experiments  
681 conducted in facilities provided by J.H. Confocal imaging was performed by R.L. and S.M. All  
682 data was analyzed by R.L. and A.P. The draft of the manuscript was prepared by R.L. and A.P.  
683 with edits from all authors.

684

685 **Materials Availability Statement:** All materials generated by the Ploss lab will be available  
686 upon request from the corresponding author.

687

688 **Data Availability:** All source data has been provided and uploaded to eLIFE at initial  
689 submission.  
690



691 **References:**

- 692 Ansari, I. H., Nanda, S. K., Durgapal, H., Agrawal, S., Mohanty, S. K., Gupta, D., Jameel, S., &  
693 Panda, S. K. (2000). Cloning, sequencing, and expression of the hepatitis E virus (HEV)  
694 nonstructural open reading frame 1 (ORF1). *J Med Virol*, 60(3), 275-283.  
695 <https://www.ncbi.nlm.nih.gov/pubmed/10630959>
- 696 Bairoch, A., & Apweiler, R. (2000). The SWISS-PROT protein sequence database and its  
697 supplement TrEMBL in 2000. *Nucleic Acids Res*, 28(1), 45-48.  
698 <https://doi.org/10.1093/nar/28.1.45>
- 699 Bergmann, E. M., Cherney, M. M., McKendrick, J., Frommann, S., Luo, C., Malcolm, B. A.,  
700 Vederas, J. C., & James, M. N. (1999). Crystal structure of an inhibitor complex of the  
701 3C proteinase from hepatitis A virus (HAV) and implications for the polyprotein  
702 processing in HAV. *Virology*, 265(1), 153-163. <https://doi.org/10.1006/viro.1999.9968>
- 703 Boeckmann, B., Bairoch, A., Apweiler, R., Blatter, M. C., Estreicher, A., Gasteiger, E., Martin, M.  
704 J., Michoud, K., O'Donovan, C., Phan, I., Pilbout, S., & Schneider, M. (2003). The  
705 SWISS-PROT protein knowledgebase and its supplement TrEMBL in 2003. *Nucleic  
706 Acids Res*, 31(1), 365-370. <https://doi.org/10.1093/nar/gkg095>
- 707 Carpentier, M., & Chomilier, J. (2019). Protein multiple alignments: sequence-based versus  
708 structure-based programs. *Bioinformatics*, 35(20), 3970-3980.  
709 <https://doi.org/10.1093/bioinformatics/btz236>
- 710 Chasapis, C. T. (2018). Interactions between metal binding viral proteins and human targets as  
711 revealed by network-based bioinformatics. *J Inorg Biochem*, 186, 157-161.  
712 <https://doi.org/10.1016/j.jinorgbio.2018.06.012>
- 713 de Castro, E., Sigrist, C. J., Gattiker, A., Bulliard, V., Langendijk-Genevaux, P. S., Gasteiger, E.,  
714 Bairoch, A., & Hulo, N. (2006). ScanProsite: detection of PROSITE signature matches  
715 and ProRule-associated functional and structural residues in proteins. *Nucleic Acids  
716 Res*, 34(Web Server issue), W362-365. <https://doi.org/10.1093/nar/gkl124>
- 717 Devhare, P., Sharma, K., Mhaindarkar, V., Arankalle, V., & Lole, K. (2014). Analysis of helicase  
718 domain mutations in the hepatitis E virus derived from patients with fulminant hepatic  
719 failure: effects on enzymatic activities and virus replication. *Virus Res*, 184, 103-110.  
720 <https://doi.org/10.1016/j.virusres.2014.02.018>
- 721 Ding, Q., Gaska, J. M., Douam, F., Wei, L., Kim, D., Balev, M., Heller, B., & Ploss, A. (2018).  
722 Species-specific disruption of STING-dependent antiviral cellular defenses by the Zika  
723 virus NS2B3 protease. *Proc Natl Acad Sci U S A*, 115(27), E6310-E6318.  
724 <https://doi.org/10.1073/pnas.1803406115>
- 725 Ding, Q., Heller, B., Capuccino, J. M., Song, B., Nimgaonkar, I., Hrebikova, G., Contreras, J. E.,  
726 & Ploss, A. (2017). Hepatitis E virus ORF3 is a functional ion channel required for  
727 release of infectious particles. *Proc Natl Acad Sci U S A*, 114(5), 1147-1152.  
728 <https://doi.org/10.1073/pnas.1614955114>
- 729 Ding, Q., Nimgaonkar, I., Archer, N. F., Bram, Y., Heller, B., Schwartz, R. E., & Ploss, A. (2018).  
730 Identification of the Intragenomic Promoter Controlling Hepatitis E Virus Subgenomic  
731 RNA Transcription. *MBio*, 9(3). <https://doi.org/10.1128/mBio.00769-18>
- 732 Emerson, S. U., Nguyen, H., Graff, J., Stephany, D. A., Brockington, A., & Purcell, R. H. (2004).  
733 In vitro replication of hepatitis E virus (HEV) genomes and of an HEV replicon  
734 expressing green fluorescent protein. *J Virol*, 78(9), 4838-4846.  
735 <https://doi.org/10.1128/jvi.78.9.4838-4846.2004>
- 736 Graff, J., Nguyen, H., Kasorndorkbua, C., Halbur, P. G., St Claire, M., Purcell, R. H., &  
737 Emerson, S. U. (2005). In vitro and in vivo mutational analysis of the 3'-terminal regions  
738 of hepatitis e virus genomes and replicons. *J Virol*, 79(2), 1017-1026.  
739 <https://doi.org/10.1128/JVI.79.2.1017-1026.2005>

- 740 Haagsma, E. B., Riezebos-Brilman, A., van den Berg, A. P., Porte, R. J., & Niesters, H. G.  
741 (2010). Treatment of chronic hepatitis E in liver transplant recipients with pegylated  
742 interferon alpha-2b. *Liver Transpl*, 16(4), 474-477. <https://doi.org/10.1002/lt.22014>
- 743 Johne, R., Reetz, J., Ulrich, R. G., Machnowska, P., Sachsenröder, J., Nickel, P., & Hofmann, J.  
744 (2014). An ORF1-rearranged hepatitis E virus derived from a chronically infected patient  
745 efficiently replicates in cell culture. *J Viral Hepat*, 21(6), 447-456.  
746 <https://doi.org/10.1111/jvh.12157>
- 747 Jumper, J., Evans, R., Pritzel, A., Green, T., Figurnov, M., Ronneberger, O., Tunyasuvunakool,  
748 K., Bates, R., Zidek, A., Potapenko, A., Bridgland, A., Meyer, C., Kohl, S. A. A., Ballard,  
749 A. J., Cowie, A., Romera-Paredes, B., Nikolov, S., Jain, R., Adler, J., . . . Hassabis, D.  
750 (2021). Highly accurate protein structure prediction with AlphaFold. *Nature*, 596(7873),  
751 583-589. <https://doi.org/10.1038/s41586-021-03819-2>
- 752 Kamar, N., Mallet, V., & Izopet, J. (2014). Ribavirin for chronic hepatitis E virus infection. *N Engl*  
753 *J Med*, 370(25), 2447-2448. <https://doi.org/10.1056/NEJMc1405191>
- 754 Kanade, G. D., Pingale, K. D., & Karpe, Y. A. (2018). Activities of Thrombin and Factor Xa Are  
755 Essential for Replication of Hepatitis E Virus and Are Possibly Implicated in ORF1  
756 Polyprotein Processing. *J Virol*, 92(6). <https://doi.org/10.1128/JVI.01853-17>
- 757 Karpe, Y. A., & Lole, K. S. (2010). NTPase and 5' to 3' RNA duplex-unwinding activities of the  
758 hepatitis E virus helicase domain. *J Virol*, 84(7), 3595-3602.  
759 <https://doi.org/10.1128/JVI.02130-09>
- 760 Karpe, Y. A., & Lole, K. S. (2011). Deubiquitination activity associated with hepatitis E virus  
761 putative papain-like cysteine protease. *J Gen Virol*, 92(Pt 9), 2088-2092.  
762 <https://doi.org/10.1099/vir.0.033738-0>
- 763 Khuroo, M. S., & Kamili, S. (2003). Aetiology, clinical course and outcome of sporadic acute  
764 viral hepatitis in pregnancy. *J Viral Hepat*, 10(1), 61-69.  
765 <https://www.ncbi.nlm.nih.gov/pubmed/12558914>
- 766 Koonin, E. V. (1991). The phylogeny of RNA-dependent RNA polymerases of positive-strand  
767 RNA viruses. *J Gen Virol*, 72 ( Pt 9), 2197-2206. <https://doi.org/10.1099/0022-1317-72-9-2197>
- 768 Koonin, E. V., Gorbalenya, A. E., Purdy, M. A., Rozanov, M. N., Reyes, G. R., & Bradley, D. W.  
769 (1992). Computer-assisted assignment of functional domains in the nonstructural  
770 polyprotein of hepatitis E virus: delineation of an additional group of positive-strand RNA  
771 plant and animal viruses. *Proc Natl Acad Sci U S A*, 89(17), 8259-8263.  
772 <https://doi.org/10.1073/pnas.89.17.8259>
- 773 Laitaoja, M., Valjakka, J., & Janis, J. (2013). Zinc coordination spheres in protein structures.  
774 *Inorg Chem*, 52(19), 10983-10991. <https://doi.org/10.1021/ic401072d>
- 775 Lemon, S. M., Amphlett, E., & Sangar, D. (1991). Protease digestion of hepatitis A virus:  
776 disparate effects on capsid proteins, antigenicity, and infectivity. *J Virol*, 65(10), 5636-  
777 5640. <https://doi.org/10.1128/JVI.65.10.5636-5640.1991>
- 778 Lenggenhager, D., Gouttenoire, J., Malehmir, M., Bawohl, M., Honcharova-Biletska, H.,  
779 Kreutzer, S., Semela, D., Neuweiler, J., Hurlimann, S., Aepli, P., Fraga, M., Sahli, R.,  
780 Terracciano, L., Rubbia-Brandt, L., Mullhaupt, B., Sempoux, C., Moradpour, D., &  
781 Weber, A. (2017). Visualization of hepatitis E virus RNA and proteins in the human liver.  
782 *J Hepatol*, 67(3), 471-479. <https://doi.org/10.1016/j.jhep.2017.04.002>
- 783 Magden, J., Takeda, N., Li, T., Auvinen, P., Ahola, T., Miyamura, T., Merits, A., & Kääriäinen, L.  
784 (2001). Virus-specific mRNA capping enzyme encoded by hepatitis E virus. *J Virol*,  
785 75(14), 6249-6255. <https://doi.org/10.1128/JVI.75.14.6249-6255.2001>
- 786 Malet, H., Coutard, B., Jamal, S., Dutartre, H., Papageorgiou, N., Neuvonen, M., Ahola, T.,  
787 Forrester, N., Gould, E. A., Lafitte, D., Ferron, F., Lescar, J., Gorbalenya, A. E., de  
788 Lamballerie, X., & Canard, B. (2009). The crystal structures of Chikungunya and  
789 Venezuelan equine encephalitis virus nsP3 macro domains define a conserved

- 791 adenosine binding pocket. *J Virol*, 83(13), 6534-6545. [https://doi.org/10.1128/JVI.00189-](https://doi.org/10.1128/JVI.00189-09)  
792 [09](https://doi.org/10.1128/JVI.00189-09)
- 793 Metzger, K., Bentaleb, C., Hervouet, K., Alexandre, V., Montpellier, C., Saliou, J. M., Ferrie, M.,  
794 Camuzet, C., Rouille, Y., Lecoeur, C., Dubuisson, J., Cocquerel, L., & Aliouat-Denis, C.  
795 M. (2022). Processing and Subcellular Localization of the Hepatitis E Virus Replicase:  
796 Identification of Candidate Viral Factories. *Front Microbiol*, 13, 828636.  
797 <https://doi.org/10.3389/fmicb.2022.828636>
- 798 Nimgaonkar, I., Archer, N. F., Becher, I., Shahradi, M., LeDesma, R. A., Mateus, A., Caballero-  
799 Gomez, J., Berneshawi, A. R., Ding, Q., Douam, F., Gaska, J. M., Savitski, M. M., Kim,  
800 H., & Ploss, A. (2021). Isocotoin suppresses hepatitis E virus replication through  
801 inhibition of heat shock protein 90. *Antiviral Res*, 185, 104997.  
802 <https://doi.org/10.1016/j.antiviral.2020.104997>
- 803 O'Donovan, C., Martin, M. J., Gattiker, A., Gasteiger, E., Bairoch, A., & Apweiler, R. (2002).  
804 High-quality protein knowledge resource: SWISS-PROT and TrEMBL. *Brief Bioinform*,  
805 3(3), 275-284. <https://doi.org/10.1093/bib/3.3.275>
- 806 Oechslin, N., Da Silva, N., Szkolnicka, D., Cantrelle, F. X., Hanouille, X., Moradpour, D., &  
807 Gouttenoire, J. (2022). Hepatitis E virus RNA-dependent RNA polymerase is involved in  
808 RNA replication and infectious particle production. *Hepatology*, 75(1), 170-181.  
809 <https://doi.org/10.1002/hep.32100>
- 810 Paliwal, D., Panda, S. K., Kapur, N., Varma, S. P., & Durgapal, H. (2014). Hepatitis E virus  
811 (HEV) protease: a chymotrypsin-like enzyme that processes both non-structural  
812 (pORF1) and capsid (pORF2) protein. *J Gen Virol*, 95(Pt 8), 1689-1700.  
813 <https://doi.org/10.1099/vir.0.066142-0>
- 814 Parvez, M. K. (2013). Molecular characterization of hepatitis E virus ORF1 gene supports a  
815 papain-like cysteine protease (PCP)-domain activity. *Virus Res*, 178(2), 553-556.  
816 <https://doi.org/10.1016/j.virusres.2013.07.020>
- 817 Parvez, M. K. (2015). The hepatitis E virus ORF1 'X-domain' residues form a putative  
818 macrodomain protein/Appr-1"-pase catalytic-site, critical for viral RNA replication. *Gene*,  
819 566(1), 47-53. <https://doi.org/10.1016/j.gene.2015.04.026>
- 820 Parvez, M. K. (2017). Mutational analysis of hepatitis E virus ORF1 "Y-domain": Effects on RNA  
821 replication and virion infectivity. *World J Gastroenterol*, 23(4), 590-602.  
822 <https://doi.org/10.3748/wjg.v23.i4.590>
- 823 Parvez, M. K., & Khan, A. A. (2014). Molecular modeling and analysis of hepatitis E virus (HEV)  
824 papain-like cysteine protease. *Virus Res*, 179, 220-224.  
825 <https://doi.org/10.1016/j.virusres.2013.11.016>
- 826 Perttilä, J., Spuul, P., & Ahola, T. (2013). Early secretory pathway localization and lack of  
827 processing for hepatitis E virus replication protein pORF1. *J Gen Virol*, 94(Pt 4), 807-  
828 816. <https://doi.org/10.1099/vir.0.049577-0>
- 829 Pettersen, E. F., Goddard, T. D., Huang, C. C., Couch, G. S., Greenblatt, D. M., Meng, E. C., &  
830 Ferrin, T. E. (2004). UCSF Chimera--a visualization system for exploratory research and  
831 analysis. *J Comput Chem*, 25(13), 1605-1612. <https://doi.org/10.1002/jcc.20084>
- 832 Proudfoot, A., Hyrina, A., Holdorf, M., Frank, A. O., & Bussiere, D. (2019). First Crystal Structure  
833 of a Nonstructural Hepatitis E Viral Protein Identifies a Putative Novel Zinc-Binding  
834 Protein. *J Virol*, 93(13). <https://doi.org/10.1128/JVI.00170-19>
- 835 Rein, D. B., Stevens, G. A., Theaker, J., Wittenborn, J. S., & Wiersma, S. T. (2012). The global  
836 burden of hepatitis E virus genotypes 1 and 2 in 2005. *Hepatology*, 55(4), 988-997.  
837 <https://doi.org/10.1002/hep.25505>
- 838 Reyes, G. R., Huang, C. C., Tam, A. W., & Purdy, M. A. (1993). Molecular organization and  
839 replication of hepatitis E virus (HEV). *Arch Virol Suppl*, 7, 15-25.  
840 [https://doi.org/10.1007/978-3-7091-9300-6\\_2](https://doi.org/10.1007/978-3-7091-9300-6_2)

- 841 Ropp, S. L., Tam, A. W., Beames, B., Purdy, M., & Frey, T. K. (2000). Expression of the  
842 hepatitis E virus ORF1. *Arch Virol*, 145(7), 1321-1337.  
843 <https://www.ncbi.nlm.nih.gov/pubmed/10963340>
- 844 Saraswat, S., Chaudhary, M., & Sehgal, D. (2019). Hepatitis E Virus Cysteine Protease Has  
845 Papain Like Properties Validated by in silico Modeling and Cell-Free Inhibition Assays.  
846 *Front Cell Infect Microbiol*, 9, 478. <https://doi.org/10.3389/fcimb.2019.00478>
- 847 Sehgal, D., Thomas, S., Chakraborty, M., & Jameel, S. (2006). Expression and processing of  
848 the Hepatitis E virus ORF1 nonstructural polyprotein. *Virology*, 3, 38.  
849 <https://doi.org/10.1186/1743-422X-3-38>
- 850 Shin, G., Yost, S. A., Miller, M. T., Elrod, E. J., Grakoui, A., & Marcotrigiano, J. (2012).  
851 Structural and functional insights into alphavirus polyprotein processing and  
852 pathogenesis. *Proc Natl Acad Sci U S A*, 109(41), 16534-16539.  
853 <https://doi.org/10.1073/pnas.1210418109>
- 854 Shukla, P., Nguyen, H. T., Faulk, K., Mather, K., Torian, U., Engle, R. E., & Emerson, S. U.  
855 (2012). Adaptation of a genotype 3 hepatitis E virus to efficient growth in cell culture  
856 depends on an inserted human gene segment acquired by recombination. *J Virol*,  
857 86(10), 5697-5707. <https://doi.org/10.1128/JVI.00146-12>
- 858 Shukla, P., Nguyen, H. T., Torian, U., Engle, R. E., Faulk, K., Dalton, H. R., Bendall, R. P.,  
859 Keane, F. E., Purcell, R. H., & Emerson, S. U. (2011). Cross-species infections of  
860 cultured cells by hepatitis E virus and discovery of an infectious virus-host recombinant.  
861 *Proc Natl Acad Sci U S A*, 108(6), 2438-2443. <https://doi.org/10.1073/pnas.1018878108>
- 862 Smith, D. B., Simmonds, P., Jameel, S., Emerson, S. U., Harrison, T. J., Meng, X. J., Okamoto,  
863 H., Van der Poel, W. H., Purdy, M. A., & Group, I. C. o. T. o. V. H. S. (2014). Consensus  
864 proposals for classification of the family Hepeviridae. *J Gen Virol*, 95(Pt 10), 2223-2232.  
865 <https://doi.org/10.1099/vir.0.068429-0>
- 866 Suppiah, S., Zhou, Y., & Frey, T. K. (2011). Lack of processing of the expressed ORF1 gene  
867 product of hepatitis E virus. *Virology*, 8, 245. <https://doi.org/10.1186/1743-422X-8-245>
- 868 Szkolnicka, D., Pollan, A., Da Silva, N., Oechslin, N., Gouttenoire, J., & Moradpour, D. (2019).  
869 Recombinant Hepatitis E Viruses Harboring Tags in the ORF1 Protein. *J Virol*, 93(19).  
870 <https://doi.org/10.1128/JVI.00459-19>
- 871 Tam, A. W., Smith, M. M., Guerra, M. E., Huang, C. C., Bradley, D. W., Fry, K. E., & Reyes, G.  
872 R. (1991). Hepatitis E virus (HEV): molecular cloning and sequencing of the full-length  
873 viral genome. *Virology*, 185(1), 120-131. <https://www.ncbi.nlm.nih.gov/pubmed/1926770>
- 874 Tellinghuisen, T. L., Marcotrigiano, J., Gorbalenya, A. E., & Rice, C. M. (2004). The NS5A  
875 protein of hepatitis C virus is a zinc metalloprotein. *J Biol Chem*, 279(47), 48576-48587.  
876 <https://doi.org/10.1074/jbc.M407787200>
- 877 Tellinghuisen, T. L., Marcotrigiano, J., & Rice, C. M. (2005). Structure of the zinc-binding  
878 domain of an essential component of the hepatitis C virus replicase. *Nature*, 435(7040),  
879 374-379. <https://doi.org/10.1038/nature03580>
- 880 Todt, D., Meister, T. L., & Steinmann, E. (2018). Hepatitis E virus treatment and ribavirin  
881 therapy: viral mechanisms of nonresponse. *Curr Opin Virol*, 32, 80-87.  
882 <https://doi.org/10.1016/j.coviro.2018.10.001>
- 883 Tunyasuvunakool, K., Adler, J., Wu, Z., Green, T., Zielinski, M., Zidek, A., Bridgland, A., Cowie,  
884 A., Meyer, C., Laydon, A., Velankar, S., Kleywegt, G. J., Bateman, A., Evans, R., Pritzel,  
885 A., Figurnov, M., Ronneberger, O., Bates, R., Kohl, S. A. A., . . . Hassabis, D. (2021).  
886 Highly accurate protein structure prediction for the human proteome. *Nature*, 596(7873),  
887 590-596. <https://doi.org/10.1038/s41586-021-03828-1>
- 888 van der Heijden, M. W., & Bol, J. F. (2002). Composition of alphavirus-like replication  
889 complexes: involvement of virus and host encoded proteins. *Arch Virol*, 147(5), 875-898.  
890 <https://doi.org/10.1007/s00705-001-0773-3>

- 891 van der Valk, M., Zaaijer, H. L., Kater, A. P., & Schinkel, J. (2017). Sofosbuvir shows antiviral  
892 activity in a patient with chronic hepatitis E virus infection. *J Hepatol*, 66(1), 242-243.  
893 <https://doi.org/10.1016/j.jhep.2016.09.014>
- 894 van Wezel, E. M., de Bruijne, J., Damman, K., Bijmolen, M., van den Berg, A. P., Verschuuren,  
895 E. A. M., Ruijgrok, G. A., Riezebos-Brilman, A., & Knoester, M. (2019). Sofosbuvir Add-  
896 on to Ribavirin Treatment for Chronic Hepatitis E Virus Infection in Solid Organ  
897 Transplant Recipients Does Not Result in Sustained Virological Response. *Open Forum*  
898 *Infect Dis*, 6(8). <https://doi.org/10.1093/ofid/ofz346>
- 899 Yang, S. H., Lee, C. G., Song, M. K., & Sung, Y. C. (2000). Internal cleavage of hepatitis C virus  
900 NS3 protein is dependent on the activity of NS34A protease. *Virology*, 268(1), 132-140.  
901 <https://doi.org/10.1006/viro.1999.0168>
- 902 Zhang, Y., & Skolnick, J. (2005). TM-align: a protein structure alignment algorithm based on the  
903 TM-score. *Nucleic Acids Res*, 33(7), 2302-2309. <https://doi.org/10.1093/nar/gki524>
- 904 Zheng, H., Chruszcz, M., Lasota, P., Lebioda, L., & Minor, W. (2008). Data mining of metal ion  
905 environments present in protein structures. *J Inorg Biochem*, 102(9), 1765-1776.  
906 <https://doi.org/10.1016/j.jinorgbio.2008.05.006>  
907  
908

909 **Figure Legends:**

910

911 **Figure 1. Mutations within the HEV putative protease domain render the virus replication**  
912 **incompetent.**

913 **a**, Genome organization of HEV and Kernow strain genotype 3 reporter replicon. ORF2 and  
914 ORF3 were replaced by *Gaussia* Luciferase reporter in frame with subgenomic promoter and  
915 translation start site. MeT – methyltransferase. Y – Y-domain. PCP – putative papain-like  
916 cysteine protease. HVR – hypervariable region. X – macro-domain. Hel – helicase. RdRp –  
917 RNA-dependent RNA polymerase. organization. The putative catalytic dyad of HEV within the  
918 reporter replicon pPCP is denoted (C483 and Y590). GDD - catalytic triad of RdRp. Gluc –  
919 *Gaussia* Luciferase. **b**, Replication kinetics of Kc1/p6 WT HEV Gluc RNA or HEV pol (-) Gluc, or  
920 HEV RNA bearing mutations in putative PCP transfected into HUH7.5 cells. Cell culture  
921 supernatants were collected from transfected cells at time points indicated (drop in signal at D2  
922 indicates wash step to eliminate signal from input RNA). **c**, End point analysis (day 4) of data  
923 from panel b. **d-g**) End point analysis (4 days post transfection) comparison of C483A mutant  
924 replication kinetics to WT and pol (-) in **d**, Kernow strain (genotype 3) **e**, SHEV (genotype 3)  
925 strain **f**, SAR55 (genotype 1) and **g**, TW6196E (genotype 4) of HEV when transfected into  
926 HepG2C3A human hepatoma cells. **h**, Alternate cysteine and alanine codons at C483 show  
927 viral replication deficiency caused by amino acid substitution and not RNA base substitution.  
928 These data represent an end point analysis (4 days post transfection) when HEV RNA replicons  
929 are transfected into HUH7 human hepatoma cells. One-Way ANOVA with Dunnett's multiple  
930 comparison analysis were conducted to determine significance. \* -  $p < 0.05$ , \*\* -  $p < 0.01$ , \*\*\* -  
931  $p < 0.001$ , \*\*\*\* -  $p < 0.0001$ . Data shown in d-g are from experiments done in technical and  
932 biological triplicate. Data shown in b, c, and h are from experiments done in technical triplicate  
933 and biological duplicate. Raw Gluc data provided in file Figure 1 – source data 1.

934

935 **Figure 2. HEV ORF1 putative PCP cannot function outside of the context of the full-length**  
936 **protein, and C483A replication deficiency can be rescued *in trans*.**

937 **a**, Schematic of the transcomplementation assay. HepG2C3A human hepatoma cells were  
938 transduced with lentivirus expressing HEV ORF1 wt, Pol (-), C483A, or putative PCP only  
939 (ORF1 AAs 433 – 592 in Kc1/p6) and subsequently transfected with *in vitro* transcribed RNA of  
940 wt, pol (-), or C483A replicons. End point analysis was conducted 4 days post transfection with  
941 *Gaussia* luciferase quantification. Cells transduced with WT ORF1 can rescue luciferase  
942 expression in pol (-) and C483A mutants *in trans*, whereas all other conditions, including the  
943 pPCP out of context of ORF1, cannot. **b-e**, End point analysis of fold change luciferase signal  
944 over WT replicon signal of **b**, Mock **c**, WT **d**, Pol (-) or **e**, C483A. One-Way ANOVA with  
945 Dunnett's multiple comparison analysis were conducted to determine significance. \* -  $p < 0.05$ , \*\*  
946 -  $p < 0.01$ , \*\*\* -  $p < 0.001$ , \*\*\*\* -  $p < 0.0001$ . Schematic in panel a generated with BioRender. Pol (-)  
947 – replication incompetent replicon due to mutation in RNA dependent RNA polymerase. PCP –  
948 putative papain-like cysteine protease. Gluc – *Gaussia* luciferase. Data shown in b-e are from  
949 experiments done in technical and biological triplicate. Raw Gluc data provided in file Figure 2 –  
950 Source Data.

951

952 **Figure 3. Point mutations of highly conserved cysteines and alanine scanning**  
953 **mutagenesis within putative PCP identifies residues and regions indispensable for viral**  
954 **replication.**

955 **a**, Partial sequence of Kc1/p6 HEV ORF1 including putative PCP that shows 8 cysteines that  
956 are highly conserved across all 8 known HEV genotypes. Orange – upstream 40 amino acids  
957 within Y domain prior to putative PCP. Blue – downstream 40 amino acids within HVR after  
958 putative PCP. **b**, HepG2C3A cells were transfected with *in vitro* transcribed RNA of WT,  
959 polymerase deficient, or point mutants in one of the conserved cysteines within the putative

960 PCP. Cell culture supernatants were collected for four days post transfection prior to *Gaussia*  
961 luciferase quantification. **c**, Unbiased triplet alanine scanning mutagenesis of entire putative  
962 PCP region. HepG2C3A cells were transfected with *in vitro* transcribed RNA of triplet alanine  
963 scanning mutant replicons to assess viral replication capacity. Data shown are fold change of  
964 wild type replicon. Brown-Forsythe One-Way ANOVA with Dunnett's T3 multiple comparison  
965 analysis were conducted to determine significance. \* -  $p < 0.05$ , \*\* -  $p < 0.01$ , \*\*\* -  $p < 0.001$ , \*\*\*\* -  
966  $p < 0.0001$ . HVR – hypervariable region. Raw Gluc data provided in file Figure 3 – Source Data.

967  
968 **Figure 4. Structural prediction models of HEV pPCP demonstrates low-confidence**  
969 **scores, suggesting lack of highly ordered secondary structure.**

970 **a**, HEV ORF1-WT AlphaFold structure prediction. **b**, HEV ORF1-WT AlphaFold structure  
971 prediction pseudo-colored by pLDDT score gradation (darker blue – higher pLDDT Score,  
972 darker red – lower pLDDT score). **c**, pLDDT score of AlphaFold prediction of HEV ORF1 across  
973 HEV genome organization for all of ORF1 (black, average 76.96), pPCP when measured with  
974 entirety of ORF1 (green, average 66.05), and pPCP when predicted by AlphaFold alone (purple,  
975 average 65.92). **d**, HEV ORF1 pPCP AlphaFold prediction pseudo-colored by alanine scanning  
976 mutagenesis ORF1 replication tolerance. Color based on fold change of WT in (**Figure 3C**).  
977 Orange – below (-2) Sea green – between (-2) and (-1). Cornflower blue – between (-1) and 0.  
978 Dark blue – replicated above WT levels. Beginning and end residues of pPCP noted in bold.

979  
980 **Figure 5. Structural prediction models suggest conserved cysteines within**  
981 **CxC[x<sub>11</sub>]CC[x<sub>8</sub>]CxC motif form divalent ion coordination pockets and novel domain-**  
982 **domain interaction with upstream Y-domain.**

983 **a**, AlphaFold structural predictions of domains within HEV ORF1. Left: Pseudo zinc-finger (amino  
984 acids 451-493 within putative PCP). Magenta: conserved cysteines C457, C459, C471, C472,  
985 C481, C483A. Potential divalent ion coordination tetrahedron outlined in yellow hatched line.  
986 Middle: amino acids 242-259 of HEV ORF1 Y-domain, and amino acids 451-462 of HEV  
987 putative PCP. Conserved cysteines C457 and C459 are outlined in magenta. D248 and H249 of  
988 upstream Y-domain highlighted in blue. Novel interdomain divalent ion coordination domain  
989 outlined in yellow hatched line. Right: HEV ORF1 protein demonstrating folding of WT and point  
990 mutant proteins. Orange (AAs 1-1036): methyltransferase(Magden et al., 2001). Yellow (AAs  
991 1018-1262): Helicase(Devhare et al., 2014; Karpe & Lole, 2010). Red (AAs 1257-1709): RNA  
992 dependent RNA polymerase(Koonin et al., 1992; Oechslin et al., 2022). Cyan: Putative  
993 membrane association domain(Parvez, 2017). **b**, Multiple sequence alignment of HEV  
994 genotypes 1-8 of partial Y-domain containing variable residue D248 and highly conserved  
995 residue H249. (\*) identical residue. (:) similar residue. (.) dissimilar residue. Yellow hatched line  
996 – bonds between coordinating amino acids

997  
998 **Figure 6. Inductively Coupled Plasma-Mass Spectrometry (ICP-MS) Shows Bivalent**  
999 **Cation Coordination by HEV ORF1.**

1000 **a**, HA-epitope tag flanked by linker sequence inserted into HVR of HEV ORF1 lentiviral  
1001 construct. **b**, Western blot analysis of HUH7 human hepatoma cell produced epitope tagged  
1002 ORF1 purification (crude cell lysate, unbound fraction, purified ORF1). **c**, Workflow of protein  
1003 sample preparation, purification, and HNO<sub>3</sub>/H<sub>2</sub>O<sub>2</sub> digestion for ICP-MS. IP- Immuno-  
1004 purification WT HA-tagged ORF1 (left), C483A HA-tagged ORF1 (middle), C563A HA-tagged  
1005 ORF1 (right) **d**, Fold-change over WT of biologically relevant divalent metal ions(Zheng et al.,  
1006 2008) bound by purified mutant epitope tagged ORF1. Any trace metal not measured as a value  
1007 above a MilliQ water only purification control was excluded from this analysis on a run by run  
1008 basis due to not being above IP buffer elution conditions. Two-Way ANOVA with Dunnett's  
1009 multiple comparison analysis were conducted to determine significance. \* -  $p < 0.05$ , \*\* -  $p < 0.01$ ,

1010 \*\*\* -  $p < 0.001$ , \*\*\*\* -  $p < 0.0001$ . Schematics in a and c were created with Biorender.com.  
1011 Unedited western blots included in file Figure 6 – Source data.

1012 **Figure 7. Immunofluorescence of epitope tagged ORF1 demonstrates loss of membrane**  
1013 **association when divalent ion coordination residues are mutated.**

1014 Confocal microscopy images of HUH7 cells stably expressing ORF1 bicistronic for zsGreen.  
1015 ORF1-HA tagged proteins were imaged using a rabbit-anti-HA antibody and AlexaFluor647  
1016 (goat anti-rabbit IgG (H+L) secondary antibody. Nuclei were visualized with Hoechst 33342  
1017 stain. All images taken at 40x magnification, and analyzed using Fiji (ImageJ2) image analysis  
1018 software. Source files of all TIFF images included in Figure 7 – Source Data.

1019  
1020 **Figure 1 - Source Data 1 - Mutations within the HEV putative protease domain render the**  
1021 **virus replication incompetent.** Spreadsheet of raw GLuc data kinetics for **b-c)** point and  
1022 double mutant bearing replicons, **d)** Kc1/p6 genotype 3 HEV replicons, **e)** SHEV3 genotype 3  
1023 replicons, **f)** SAR55 genotype 1 HEV replicons, **g)** Tw6196E genotype 4 replicons, **h)** alternate  
1024 codons of Kc1/p6 genotype 3 HEV replicons.

1025  
1026 **Figure 2 – Source Data - HEV ORF1 putative PCP cannot function outside of the context**  
1027 **of the full-length protein, and C483A replication deficiency can be rescued *in trans*.**  
1028 Spreadsheet of raw GLuc data kinetics for transduced HepG2C3A cells (mock, ORF1 WT,  
1029 ORF1 Pol (-), ORF1 C483A, HEV pPCP domain) transfected with HEV Kc1/p6 replicons (WT,  
1030 Pol (-), C483A). Each sheet corresponds to different transduction condition.

1031  
1032 **Figure 3 – Source Data - Point mutations of highly conserved cysteines and alanine**  
1033 **scanning mutagenesis within putative PCP identifies residues and regions indispensable**  
1034 **for viral replication.** Spreadsheet of raw GLuc data kinetics for Kc1/p6 conserved cysteine  
1035 point mutant replicons and alanine scanning mutagenized triplets.

1036  
1037 **Figure 6 – Source Data - Inductively Coupled Plasma-Mass Spectrometry (ICP-MS) Shows**  
1038 **Bivalent Cation Coordination by HEV ORF1.** Unedited western blots of ORF1 HA-IP.

1039  
1040 **Figure 7 – Source Data - Immunofluorescence of epitope tagged ORF1 demonstrates loss**  
1041 **of membrane association when divalent ion coordination residues are mutated.** TIFF files  
1042 of confocal microscopy used in subcellular localization analysis.

1043  
1044 **AlphaFold Predictions Figures 4-5 – Source Data.** These files are the best ranked (ranked 0)  
1045 predictions generated by AlphaFold of HEV ORF1, its associated point mutants, and the  
1046 hepatitis A virus (HAV) 3C protease.



**Figure 1:**

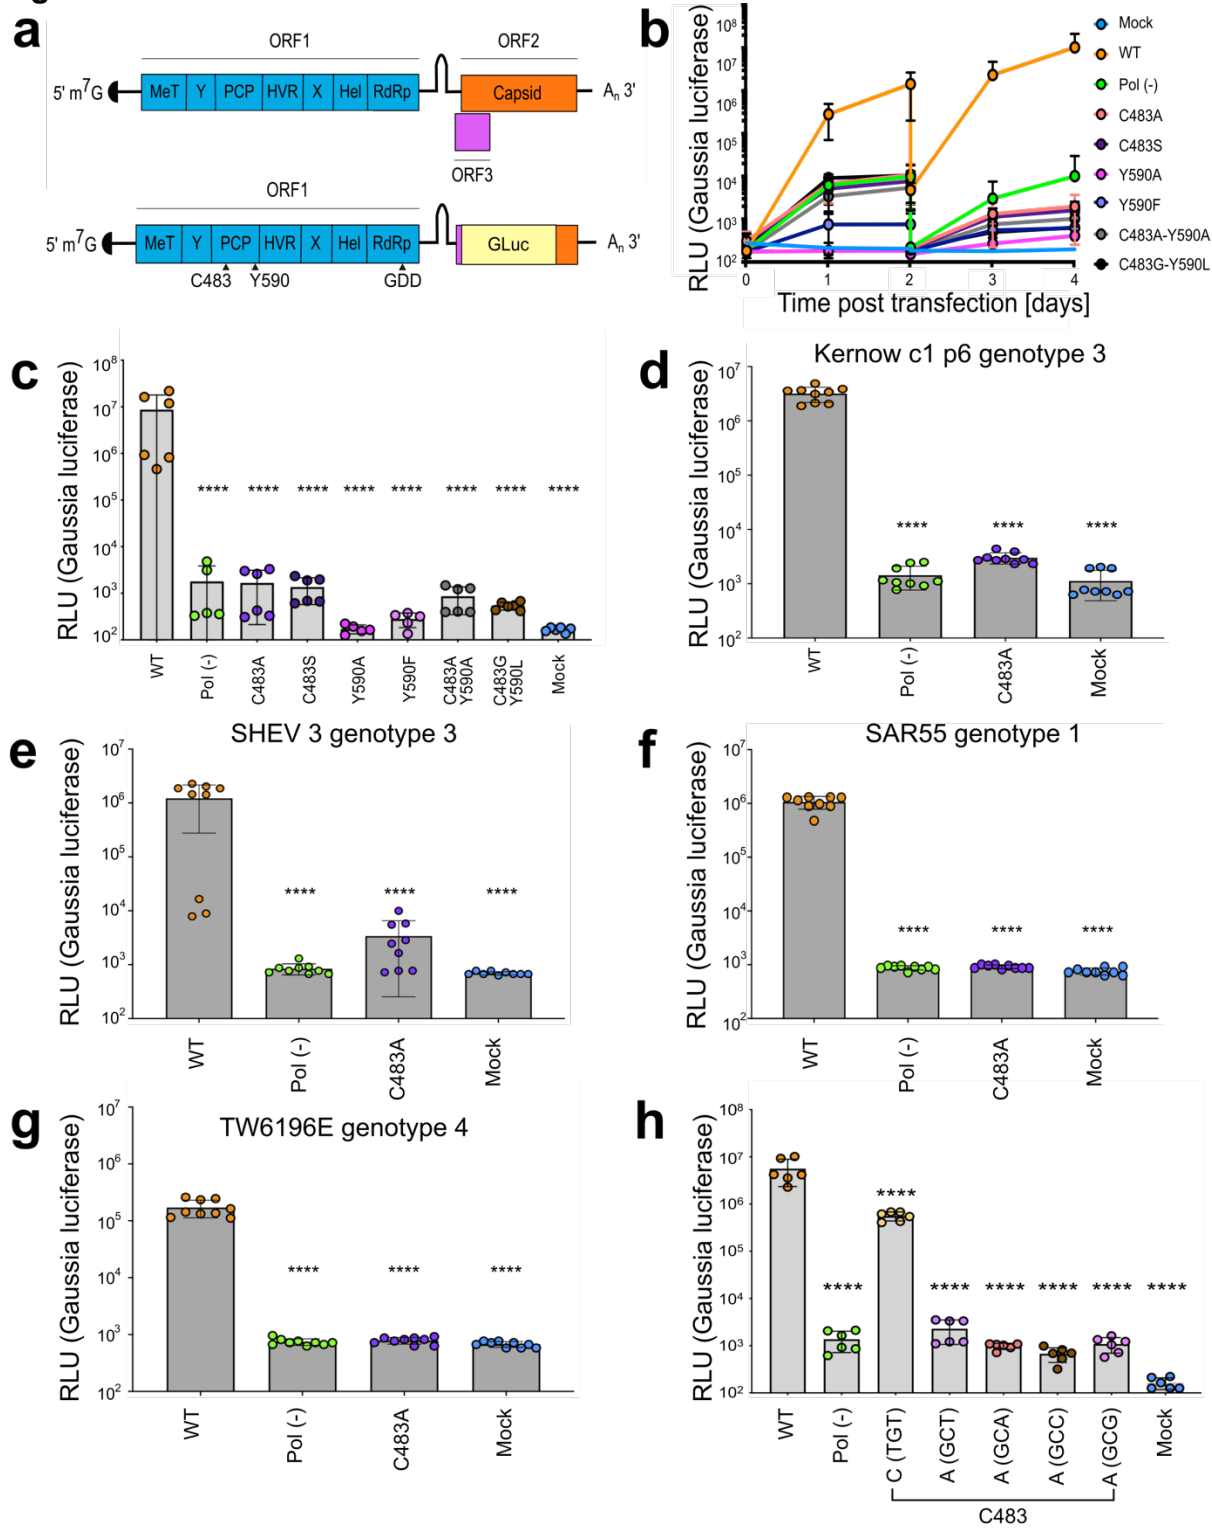

**Figure 2:**

**a**

HepG2C3A Cells

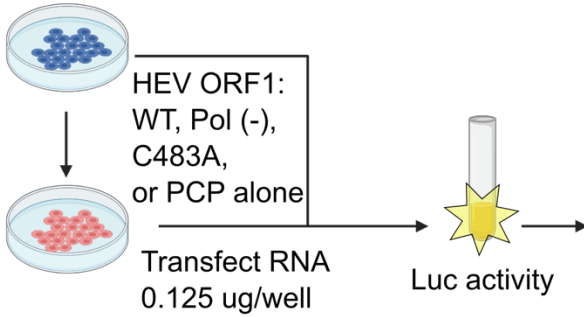

**Transduction Condition**

WT Pol (-) C483A PCP  
WT

| Reporter Replicon | Transduction Condition |         |       |     |
|-------------------|------------------------|---------|-------|-----|
|                   | WT                     | Pol (-) | C483A | PCP |
| WT                | +++                    | ++      | ++    | ++  |
| Pol (-)           | +++                    | -       | -     | -   |
| C483A             | +++                    | -       | -     | -   |

**b**

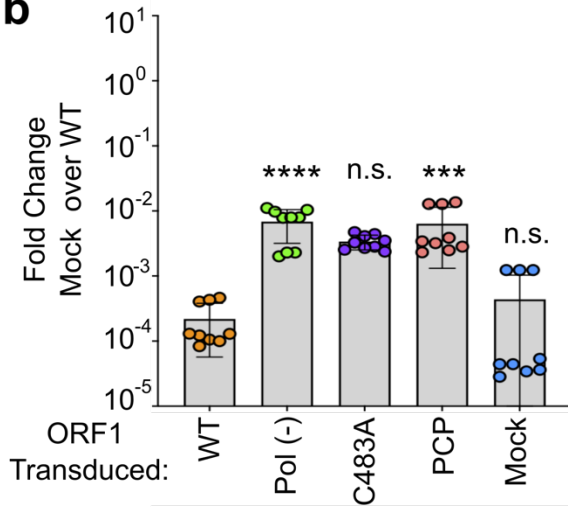

**c**

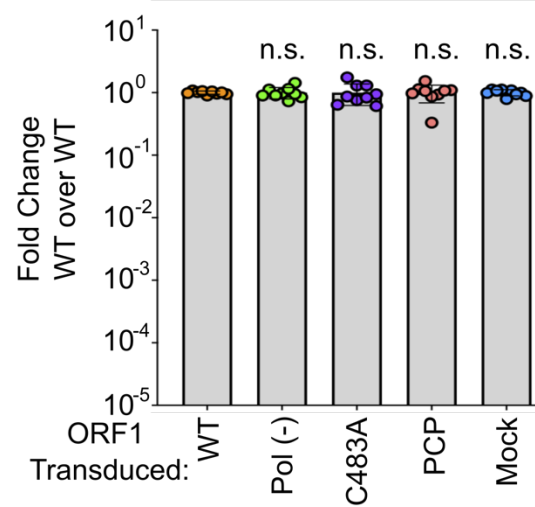

**d**

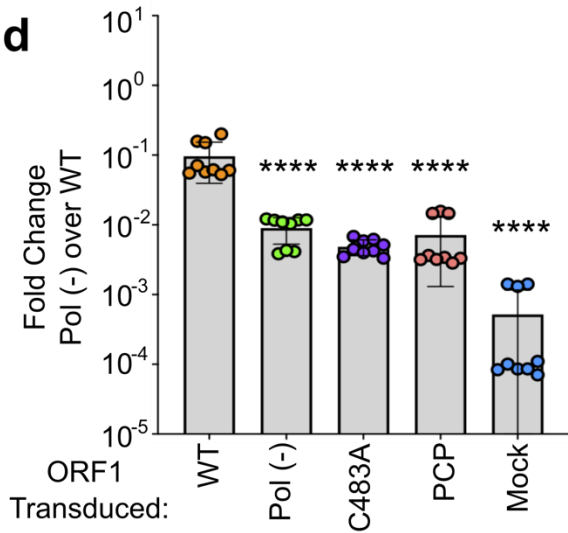

**e**

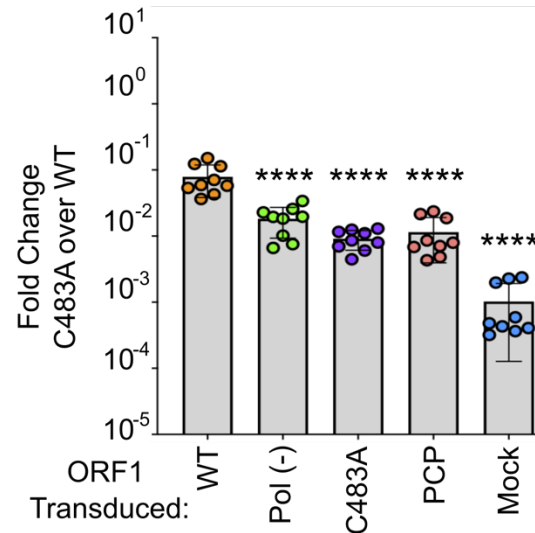

**Figure 3:**

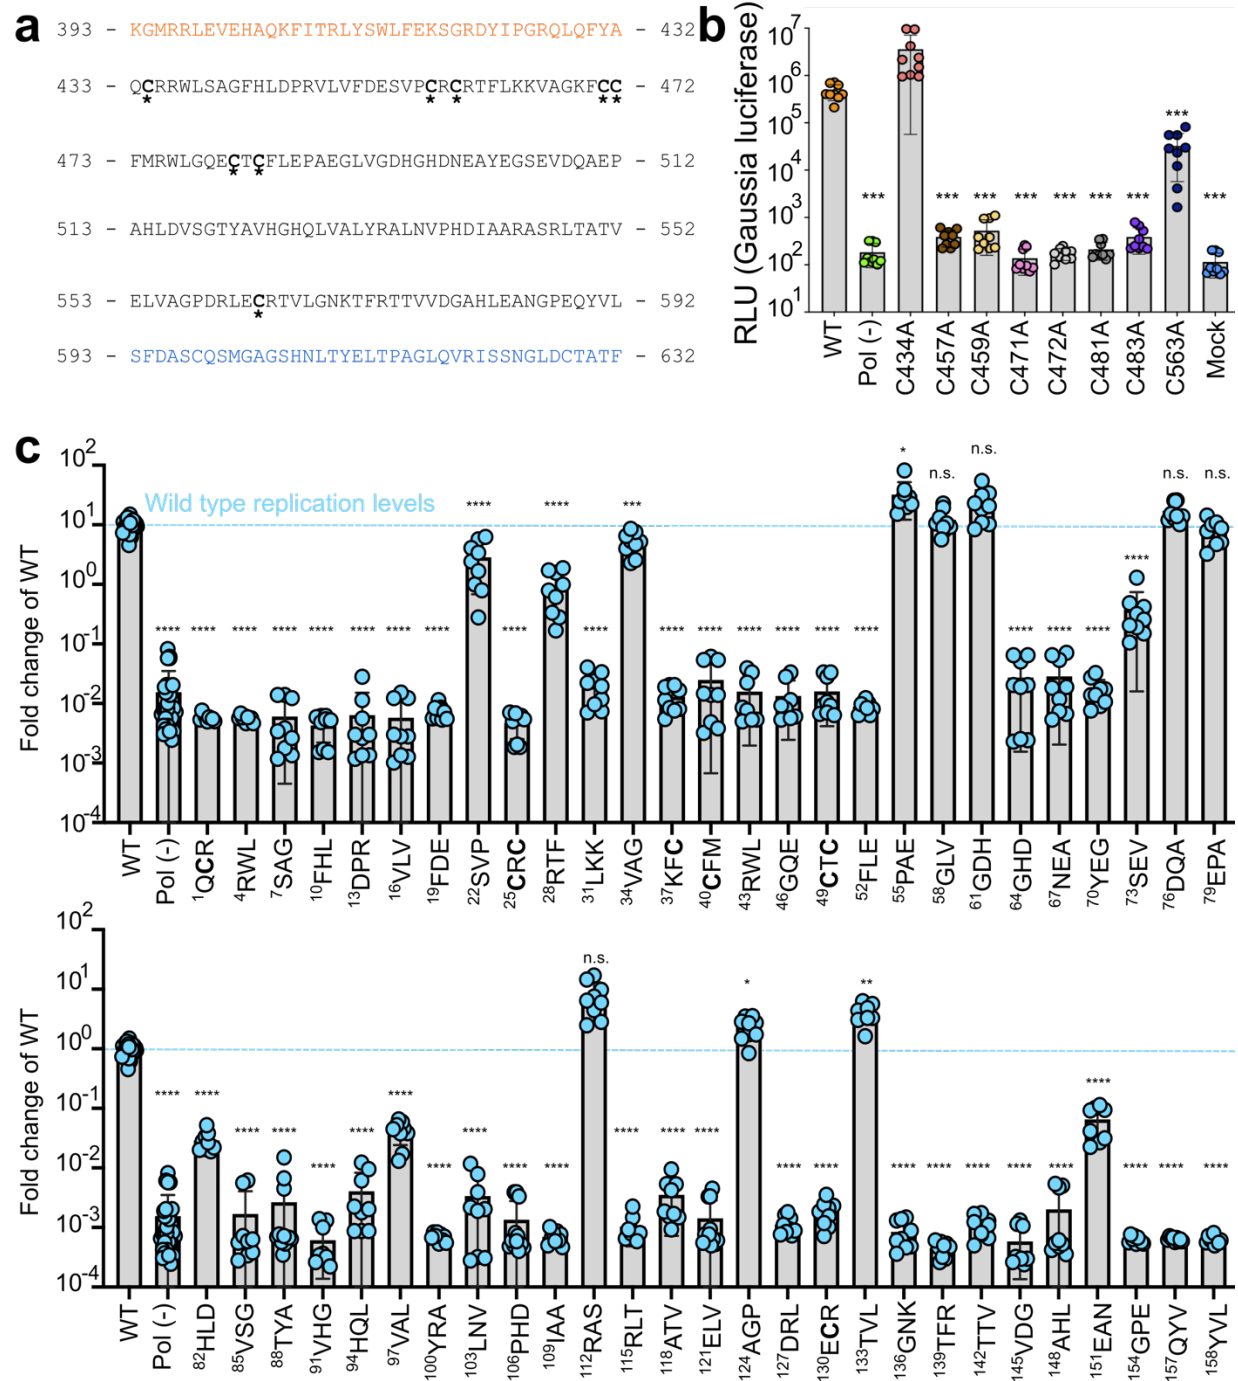

**Figure 4:**

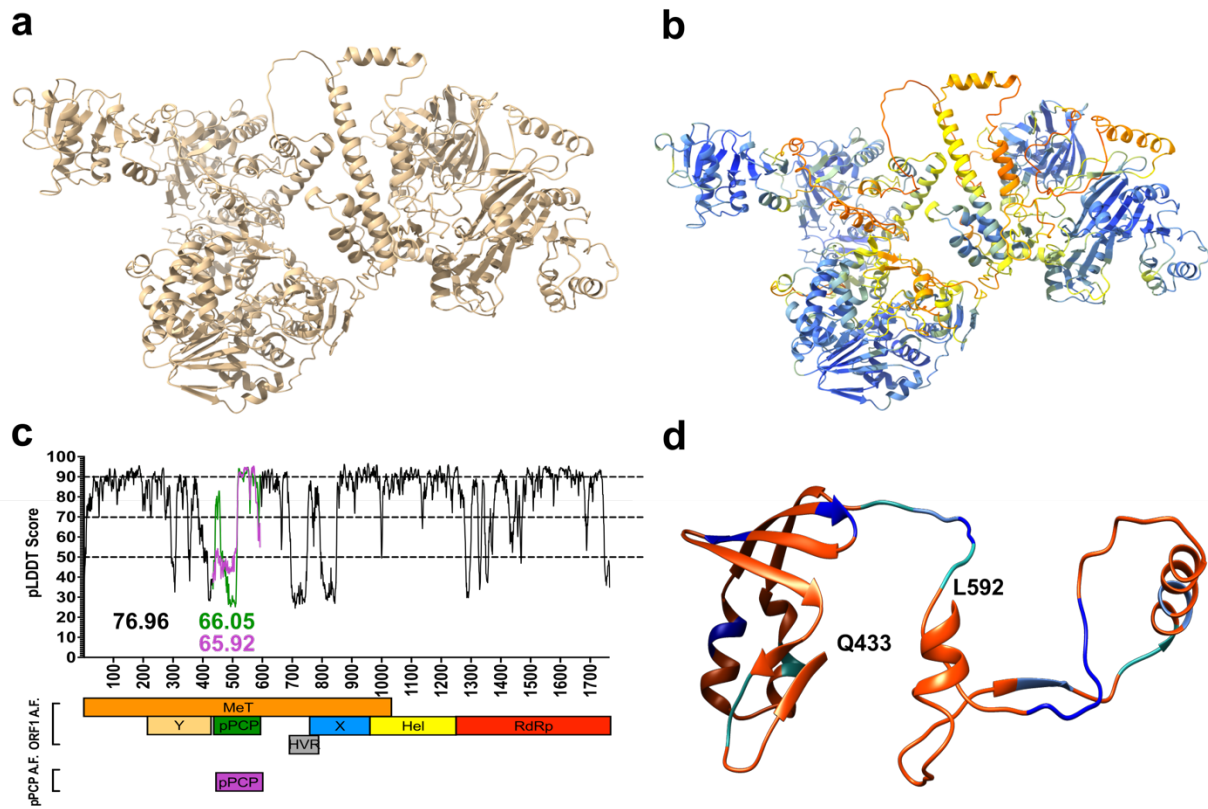

**Figure 5:**

**a**

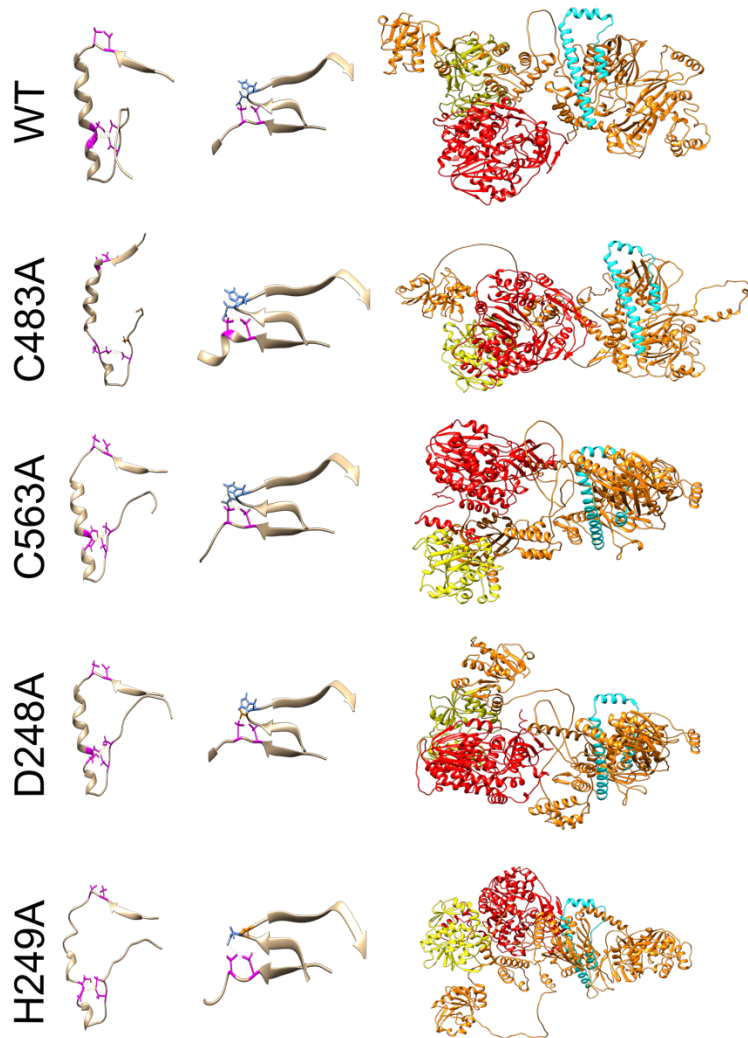

**b**

|                      |  |                      |     |
|----------------------|--|----------------------|-----|
|                      |  | **:...*****          |     |
| HEV gt 1             |  | 243 - TKVTGDHPLVIE - | 254 |
| HEV gt 1 (SAR55)     |  | 242 - TKVTGDHPLVIE - | 253 |
| HEV gt 2             |  | 243 - TKVGEHPLVIE -  | 254 |
| HEV gt 3 (Kernow c1) |  | 243 - TKIVGDHPLVIE - | 254 |
| HEV gt 3 (SHEV3)     |  | 243 - TKIVGDHPLVIE - | 254 |
| HEV gt 4             |  | 243 - TKVTGDHPLVIE - | 254 |
| HEV gt 5             |  | 243 - TKVTGSHPLVIE - | 254 |
| HEV gt 6             |  | 243 - TKVTGNHPLVIE - | 254 |
| HEV gt 7             |  | 243 - TKVTGNHPLVIE - | 254 |
| HEV gt 8             |  | 243 - TKITTDHPLVIE - | 254 |

**Figure 6:**

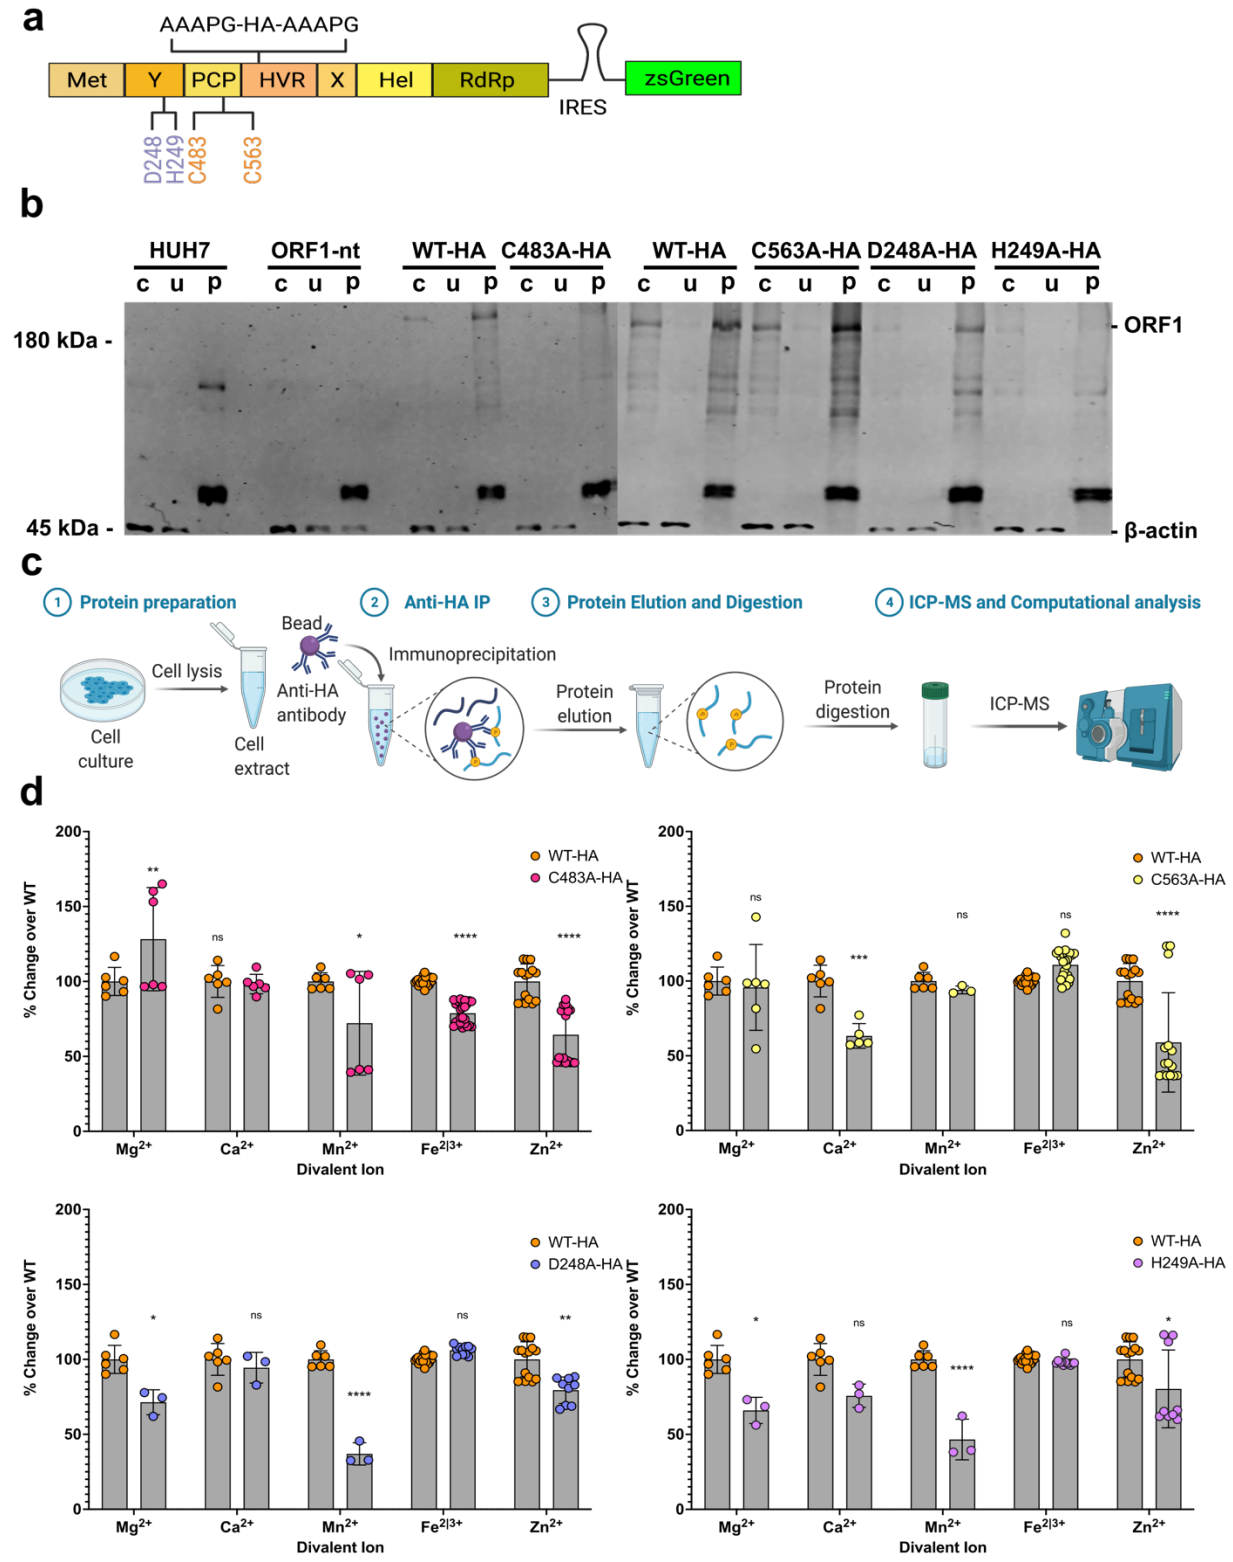

**Figure 7:**

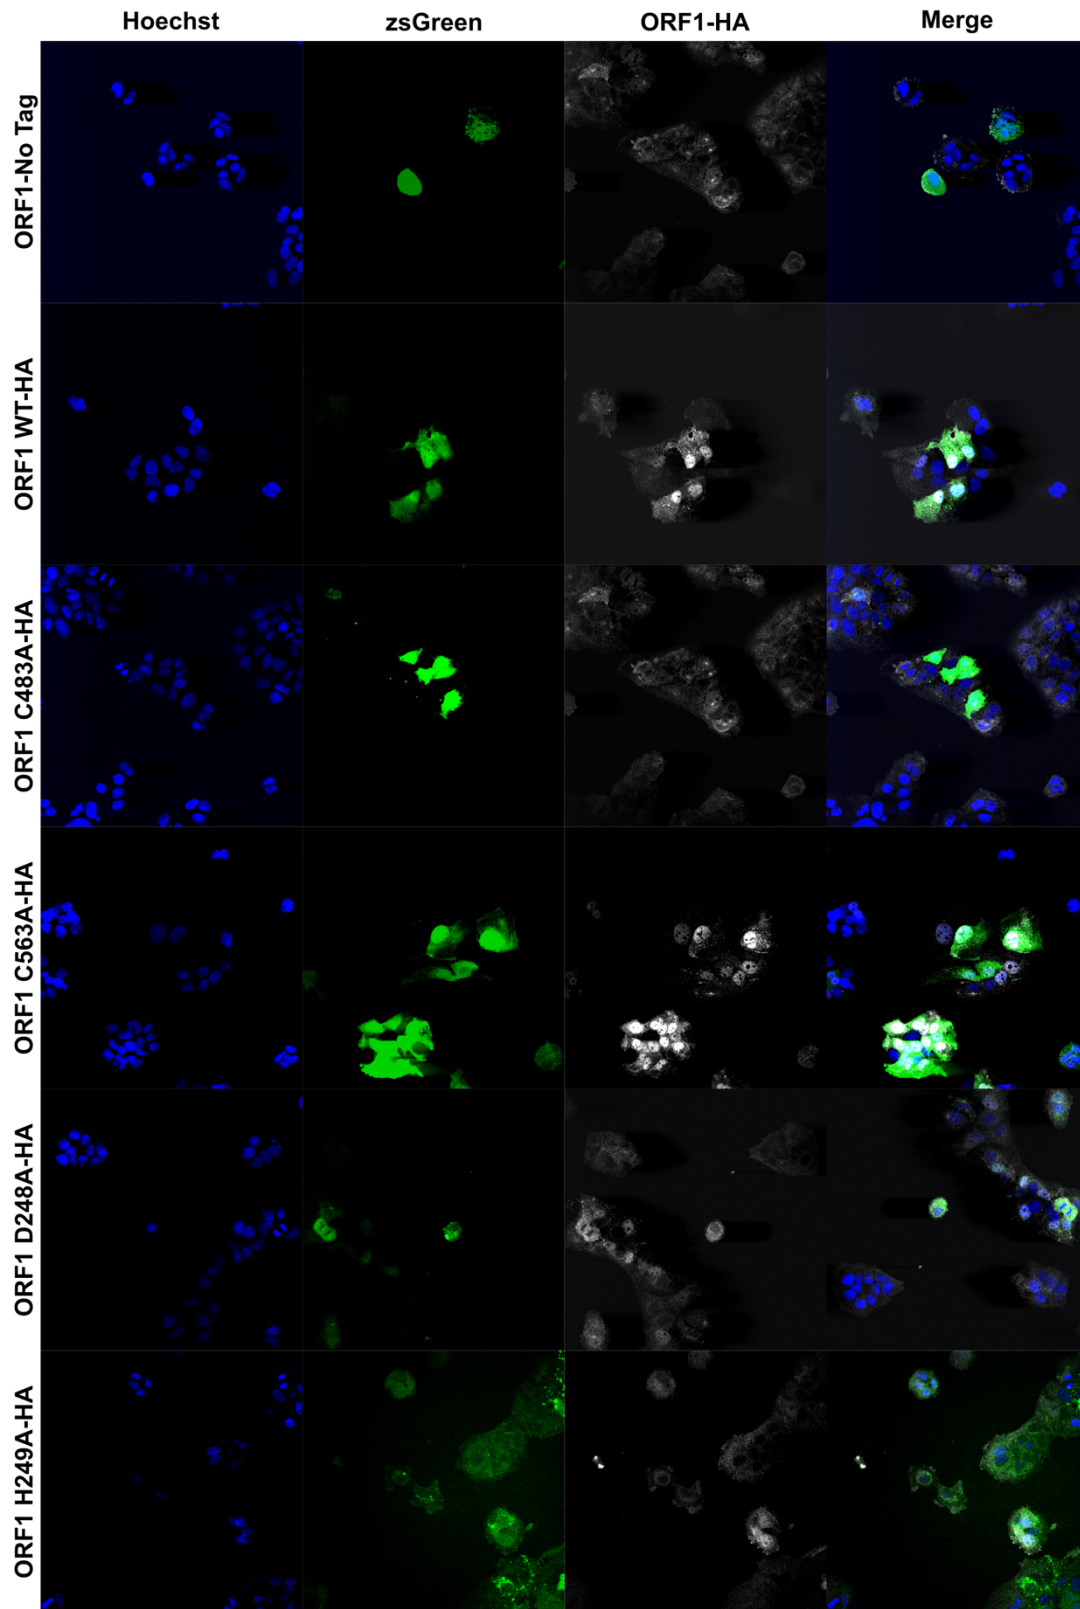

**SUPPLEMENTARY INFORMATION  
FOR**

**Structural features stabilized by divalent cation coordination within hepatitis E virus ORF1 are critical for viral replication**

**Robert LeDesma<sup>1</sup>, Abhishek Biswas<sup>1</sup>, Stephanie Maya<sup>1</sup>, Stefania Gili<sup>2</sup>, John Higgins<sup>2</sup>, Alexander Ploss<sup>1,\*</sup>**

<sup>1</sup>Department of Molecular Biology, Lewis Thomas Laboratory, Princeton University, Princeton, NJ 08544, USA.

<sup>2</sup>Department of Geosciences, Princeton University, Princeton, NJ, 08544, USA.

\*Correspondence should be addressed to A.P.: [aploss@princeton.edu](mailto:aploss@princeton.edu); +1 (609) 258-7128



## Table of contents:

### Supplementary Figures

**Supplementary Figure 1.** Alignment of one or more representative strain(s) from each known HEV genotype putative PCP domain with RUBV protease reveals highly conserved octa-cysteine motif in HEV.

**Supplementary Figure 2.** Bioinformatic analysis (PROSITE) predicts CxC[X11]CC[X8]CxC motif (CxC motif) to be necessary for divalent metal ion coordination.

**Supplementary Figure 3.** AlphaFold predicts structured domains of HEV ORF1 and viral protease of hepatitis A virus (HAV) with high confidence.

**Supplementary Figure 4.** Sequence alignments, percent similarity and identity of Kc1/p6 macrodomain with macrodomains of SINV and CHIKV.

**Supplementary Figure 5.** Replication end point analysis of WT-HA, D248A, and H249A Gluc constructs.

### Supplementary Tables:

**Supplementary Table 1.** Primer sequences for all constructs in this study.

**Supplementary Table 2.** Predicted bond lengths (Å) of cysteines within HEV hexa-cysteine motif and D248/H249 of upstream Y-domain.

### Supplementary Files:

**Supplementary File 1:** Raw trace element data for each sample series of ICP-MS

### Supplementary Movies:

**Supplementary Movie 1:** AlphaFold Prediction of HEV ORF1-WT and alanine scan triplets highlighted demonstrates tolerable mutations largely localize to predicted disordered regions.

**Supplementary Movie 2:** AlphaFold Prediction of HEV ORF1-WT

**Supplementary Movie 3:** AlphaFold Prediction of HEV ORF1-C483A

**Supplementary Movie 4:** AlphaFold Prediction of HEV ORF1-C563A

**Supplementary Movie 5:** AlphaFold Prediction of HEV ORF1-D248A

**Supplementary Movie 6:** AlphaFold Prediction of HEV ORF1-H249A

```

HEV gt 1          401 EHAQKFITRLYSWLFEKSGRDYIPGRQLEFYAQCRRWLSAGFHLDPRVLVFDESAPCHCRTAI-RKALSKFC 471
HEV gt 1 (SAR55) 400 EHAQKFITRLYSWLFEKSGRDYIPGRQLEFYAQCRRWLSAGFHLDPRVLVFDESAPCHCRTAI-RKAVSKFC 471
HEV gt 2          401 EHAQKFISRLYSWLFEKSGRDYIPGRQLQFYAQCRRWLSAGFHLDPRVLVFDESVPCSRTTI-RRIAGKFC 471
HEV gt 3 (Kernow C1) 401 EHAQKFITRLYSWLFEKSGRDYIPGRQLQFYAQCRRWLSAGFHLDPRVLVFDESVPCSRTFL-KKVAGKFC 471
HEV gt 3 (SHEV3)  401 EHAQKFITRLYSWLFEKSGRDYIPGRQLQFYAQCRRWLSAGFHLDPRVLVFDESVPCSRTFL-KKVAGKFC 471
HEV gt 4          401 EHAQKFITRLYSWLFEKSGRDYIPGRQLQFYAQCRRWLSAGFHLDPRVLVFDEAAPCCRRSSFL-RKAAHKFC 471
HEV gt 4 (TW4)    401 EHAQKFITRLYSWLFEKSGRDYIPGRQLQFYAQCRRWLSAGFHLDPRVLVFDESAPCCRRSSFL-RKAAHKFC 471
HEV gt 5          401 EHAQKFITRLYSWLFEKSGRDYIPGRQLQFYAQCRRWLSAGFHLDPRVLVFDEAAPCCRRDLL-RRAAQKFC 471
HEV gt 6          401 EHAQRFVTRLYSWLFEKSGRDYIPGRQLQFYAQCRRWLSAGFHLDPRVLVFDEAAPCCRCRDFL-RKAVKKFC 471
HEV gt 7          401 EHAQKFITRLYSWLFEKSGRDYIPGRQLEFYAQCRRWLSAGFHLDPRVLVFDEAAACCRCRSSL-QKAVSRFC 471
HEV gt 8          401 EHAQKFITRLYSWLFEKSGRDYIPGRQVEFYAQCRRWLSAGFHLDPRVLVFDESAPCCRCRSSL-RKAANSFC 471
RUBV              1078 EHLATHFPLNHYSVLKPAEVRPPRGMCGSDMWRCRGW--HGMP-QVRCTPSNAHAA-LCRTGVPPRASTR-- 1143

HEV gt 1          472 CFMKWLGQECTCFLQPAEGAVGDQGHDNEAYEGSD-VDPA-ESAISDISGSYVVPGTALQ-PLYQALDLPAE 540
HEV gt 1 (SAR55)  471 CFMKWLGQECTCFLQPAEGVVGDQGHDNEAYEGSD-VDPA-ESAISDISGSYVVPGTALQ-PLYQALDLPAE 540
HEV gt 2          472 CFMKWLGQECCFLQPAEGLAGDQGHDNEAYEGSD-VDTA-EPATLDITGSYIVDGRSLQ-TVYQALDLPAD 540
HEV gt 3 (Kernow C1) 472 CFMRWLGQECTCFLEPAEGLVGDHGHDNEAYEGSE-VDQA-EPAHLDVSGTYAVHGRQLV-ALYRALNVPHD 540
HEV gt 3 (SHEV3)  472 CFMRWLGQECTCFLEPAEGLVGDHGHDNEAYEGSE-VDQA-EPAHLDVSGTYAVHGRQLV-ALYRALNVPHD 540
HEV gt 4          472 CFMRWLGQDCTCFLQPIEGRVGEQGYDNEAFEGSD-VDPA-EEATVSISGSYIVTGRLQ-PLYQALGIPSD 540
HEV gt 4 (TW4)    472 CFMRWLGQDCTCFLQPIEGRVGEQGYDNEAFEGSD-VDPA-EEATVSISGSYIVTGRLQ-PLYQALGIPSD 540
HEV gt 5          472 CFMRWLGQECTCFLQPVEGRIGEQGYDNEAYEGSD-VDPA-EEVRVSVSGSYIVSGSQLQ-SYFKALGLPDD 540
HEV gt 6          472 CFMRWLGQECTCFLQPVEGHIGDQGHDNEAFEGSD-IDPA-EEVTFSISGSYIAAGNQLQ-PLYQALGIPAD 540
HEV gt 7          472 CFMRWLGQECNCFLQPVEGLIGDEGHDNEAYEGSE-VDPA-EPAAPDIDGIYTVSGAQLS-ALYRALGLPTD 540
HEV gt 8          472 CFMRWLGQECNCFLEPIEGHVGDEGHDNEAYEGSE-VDSA-DLAEPDPSGTFVVRGDQLL-PLFQALNLPSD 540
RUBV              1144 G-GE-LDPN-TCWLRAA ANVAQAARACGAYTSAGCPKCAYGRALSEARTHEDFAALSQRWSASHADASPDGT 1211
                *

HEV gt 1          541 IVARAGRLTATV--KVSQV-DGR-IDC--ETLLGNKTFRTSFVD-GAVLETNG-PE---R--HNLSSFDASQST 600
HEV gt 1 (SAR55)  540 IVARAGRLTATV--KVSQV-DGR-IDC--ETLLGNKTFRTSFVD-GAVLETNG-PE---R--HNLSSFDASQST 599
HEV gt 2          541 LVARAARLSSATV--TVTET-SGR-LDC--QTMIGNKTFLTTFVD-GARLEVNG-PE---Q--LNLSSFDSQQS 600
HEV gt 3 (Kernow C1) 541 IAARASRLTATV--ELVAG-PDR-LEC--RTVLGNKTFRTTVVD-GAHLEANG-PE---Q--YVLSFDASCQS 600
HEV gt 3 (SHEV3)  541 IAARASRLTATV--ELTAS-PDR-LEC--RTVLGNKTFRTTVVD-GAHLEANG-PE---Q--YVLSFDASRQS 600
HEV gt 4          541 LAARASRLAATV--EVSDA-EGR-LTC--KTILGNKTFSTVFTD-GAQLEANG-PE---Q--YVLSLDLTKQT 600
HEV gt 4 (TW4)    541 LAARASRLAATV--EVSDA-EGR-LTC--KTILGNKTFSTVFTD-GAQLEANG-PE---Q--YVLSFDLTKQT 600
HEV gt 5          541 LAARASRLTATV--EVDDT-DGH-FTC--RTVLGNKVFTTDFAD-GTVLESNG-PE---Q--YVLSFDSAKQC 600
HEV gt 6          541 LVARASRLAATV--EVEDT-NGR-LVC--RTTLGNKTFTTVFTD-GAELEANG-PE---T--YVLSFDSAKQC 600
HEV gt 7          541 LAARASRLVATV--ELTSH-PGR-IEC--KTTLGNKIFLTSFLD-GSRLEANG-PE---E--FILSFDADRQT 600
HEV gt 8          541 LVARASRLTATV--ELTVD-SNR-LDC--KTTLGNKVFRTTFID-GARLEANG-PE---Q--YVLSFDASKRS 600
RUBV              1212 TGDPLDLPLMETVGCACSRVVGSEHEAPPDHLLVS-LHRAPNGPWGVVLEVRARPEGGNPTGHFVCAVGGPR 1283
                *

```

**Supplementary Figure 1: Alignment of one or more representative strain(s) from each known HEV genotype putative PCP domain with RUBV protease reveals highly conserved octa-cysteine motif in HEV.** Black – HEV Putative PCP. Brown - Upstream flanking 32 AAs – downstream flanking 8 AAs. (\*) Catalytic dyad of RUBV protease at putative catalytic dyad positions within HEV putative PCP domain. Bold – 8 highly conserved cysteines across all known HEV genotypes. RUBV – Rubella virus. TW4 = HEV strain TW6196E. Alignments generated using ClustalW algorithm within the genome sequence viewing program SnapGene.

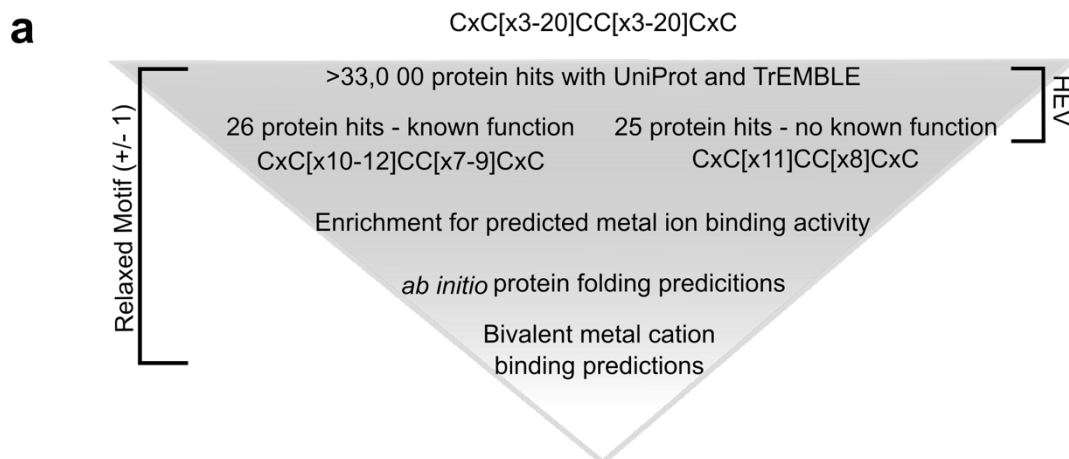

**b**

**HEV Motif**  
**CxC[x11]CC[x8]CxC**  
**[(+/-)1]**  
**CxC[10-12]CC[x7-9]CxC**

| Function                        | Gene name    |
|---------------------------------|--------------|
| Methyltransferase / transferase | ANM2         |
| Colloid osmotic lysis           | CR5AC, CRBA  |
| <b>Copper metallothioneins</b>  | MT2, MTCU    |
| Calcium binding snake toxin     | PA23         |
| Zinc ion binding                | TRIM42       |
| <b>FGF antagonist</b>           | SPRY2, SPRY3 |
| Keratin Intermediate Filament   | KRA53        |
| GPCR                            | GG3          |

| Function                             | Gene name                   |
|--------------------------------------|-----------------------------|
| Cysteine-Rich Tail Protein           | CRTP1                       |
| Colloid osmotic lysis                | CR5AC, CRBA                 |
| <b>Metallothioneins</b>              | MT MT1, MT2, MT3, MTA, MTB  |
| Cell number regulator                | CNR13                       |
| Zinc ion binding                     | TRIM42                      |
| Putative sodium transport            | NPT2B                       |
| <b>Keratin Intermediate Filament</b> | KRA51 - KRA55, KRA58, SCGR8 |
| GPCR                                 | AGRF1                       |

**Supplementary Figure 2: Bioinformatic analysis (PROSITE) predicts CxC[X11]CC[X8]CxC motif (CxC motif) to be necessary for divalent metal ion coordination.**

a, Bioinformatic pipeline depicting hexa-cysteine motif search across all deposited proteins in UniProt and TrEMBL databases. Exact HEV motif search yielded 25 protein hits, all with unknown functions (right side). 11 amino acids upstream of core CC motif and 8 amino acid motif downstream of core CC were relaxed by (+/-) 1 to yield 26 protein hits, all with known functions and an enrichment for divalent ion binding activity. b, Utilizing motif searches with ScanProSite (de Castro et al., 2006) and TrEMBL (Bairoch & Apweiler, 2000; Boeckmann et al., 2003; O'Donovan et al., 2002), we used a relaxed expression of the CxC motif where each stretch of [x] could be (+/-) 1: (CxC[x](10-12)CC[x](7-9)CxC). This analysis brought forth 26 proteins with known functions, enriched for proteins with divalent metal ion binding activity. Green: Proteins that matched the first stretch of [x 10-12]. Orange: Proteins that matched the second stretch of [x 7-9].

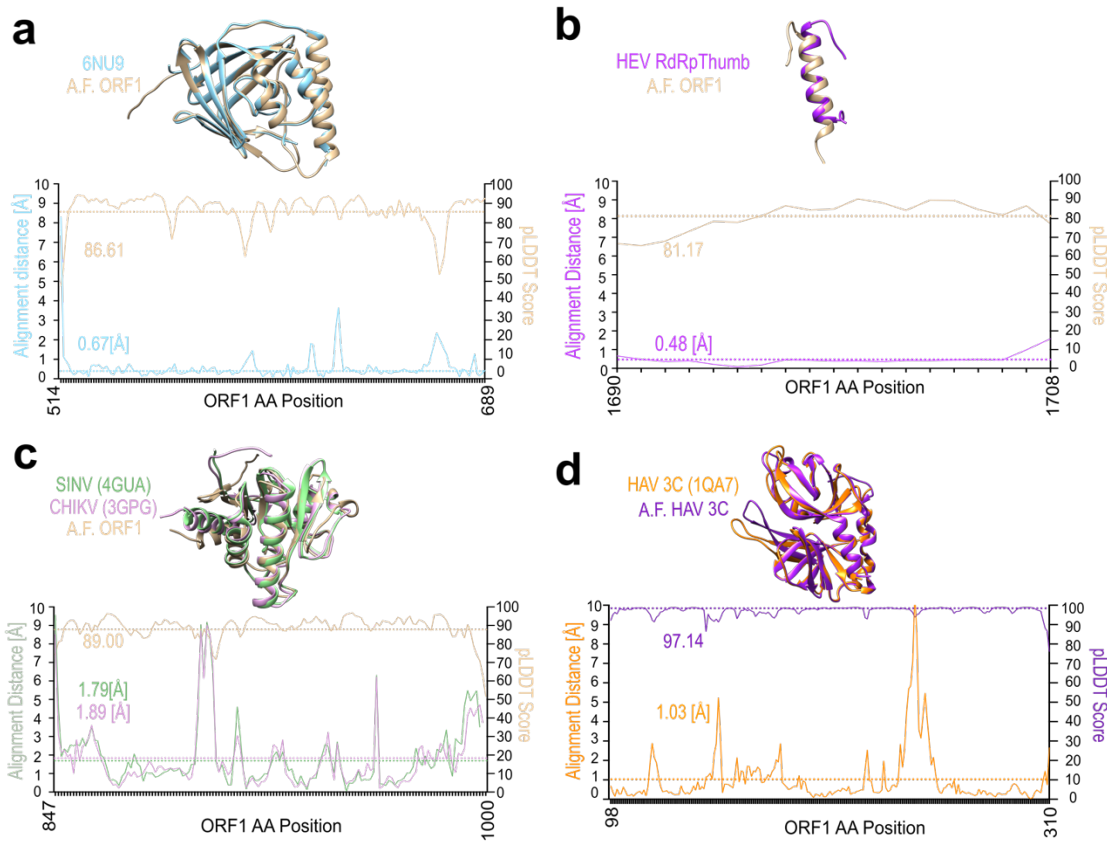

### Supplementary Figure 3: AlphaFold predicts structured domains of HEV ORF1 and viral protease of hepatitis A virus (HAV) with high confidence.

**a-c**, Superimposition of AlphaFold (A.F.) prediction of corresponding Kernow C1/p6 ORF1 regions (Bronze) plus distance plot in (Å) and pLDDT score of A.F. prediction with: **a**, the crystal structure of HEV SAR-55 ORF1 amino acids 510-691 (Blue) (PDB: 6NU9)(Proudfoot et al., 2019). **b**, amphipathic “thumb” of HEV gt3 strain 83-2-27 RNA dependent RNA Polymerase (amino acids 1628-1647; ORF1 kc1/p6 residues 1684-1709) (Purple)(Oechsli et al., 2022). **c**, macro domains of Sindbis virus (Green) (SINV amino acids 1342 – 1509 of PDB: 4GUA)(Shin et al., 2012) and Chikungunya virus (Pink) (CHIKV) (PDB: 3GPG)(Malet et al., 2009). **d**, Superimposition of hepatitis a virus (HAV) 3C protease with corresponding A.F. prediction plus distance plot in (Å) and pLDDT score of A.F. prediction. Orange – HAV 3C protease (PDB: 1QA7)(Bergmann et al., 1999) and Purple – HAV 3C protease A.F. prediction. Hatched lines show averages of corresponding measurement.

|                                   |                                                                                |
|-----------------------------------|--------------------------------------------------------------------------------|
| ▶ SINV Macrodomain (4GUA)         | 354 ADCQEEAVVNAANPLGRPGEGVCRAIYKRWPSTF--TDSATETGTARMTVCLGKKVIHAVGPDFR--KHP 419 |
| ▶ Kc1 p857-A1000...ain alignment) | 14 SDC--DWLVNASNPGHRPGGGLCHAFHQRFPEAFYPTFIMREGLAAYTL-TPRPIIHAVAPDYRVEQNP 80    |
| ▶ SINV Macrodomain (4GUA)         | 420 EAEALKLLQNAYHAVADLVNEHNIKSVAIPLLSTGIY 456                                  |
| ▶ Kc1 p857-A1000...ain alignment) | 80 -----KRLEAAYRETCS-----RRGTAAYPLLGSGIY 107                                   |
| ▶ Kc1 p857-A1000...ain alignment) | 13 ESDCDWLVNASNPGHRPGGGLCHAFHQRFPEAFYPTFIMREGLAAYTL-PRPIIHAVAP---DYRVEQ 78     |
| ▶ 3GPG CHIKV Macrodomain nsP3     | 13 KNDEECVVNAANPRGLPGDGVCKAVYKKWPESFKNSATPV--GTAKTVMCGTYPVIHAVGPNFSNYSESE 80   |
| ▶ Kc1 p857-A1000...ain alignment) | 79 NPKRLEAAYRETCS---SRRG--TAAYPLLGSGIY 107                                     |
| ▶ 3GPG CHIKV Macrodomain nsP3     | 81 GDRELAAYREVAKEVTRLGVNSVAIPLLSTGVY 114                                       |

### SINV vs. ORF1 macro domain

|                     |                     |
|---------------------|---------------------|
| Matrix:             | BLOSUM62            |
| Gap open penalty:   | 10.0                |
| Gap extend penalty: | 1.0                 |
| Length:             | 104                 |
| Identity:           | 37 / 104 ( 35.58% ) |
| Similarity:         | 59 / 104 ( 56.73% ) |
| Gaps:               | 11 / 104 ( 10.58% ) |

### CHIKV vs. ORF1 macro domain

|                     |                     |
|---------------------|---------------------|
| Matrix:             | BLOSUM62            |
| Gap open penalty:   | 10.0                |
| Gap extend penalty: | 1.0                 |
| Length:             | 107                 |
| Identity:           | 39 / 107 ( 36.45% ) |
| Similarity:         | 58 / 107 ( 54.21% ) |
| Gaps:               | 17 / 107 ( 15.89% ) |

**Supplementary Figure 4: Sequence alignments, percent similarity and identity of Kc1/p6 macrodomain with macrodomains of SINV and CHIKV.** Alignments of ORF1 macrodomain (AAs 857-1000) with SINV macrodomain (AAs 1342 – 1509 of PDB: 4GUA)(Shin et al., 2012) (top, bottom left) and with CHIKV macrodomain (PDB: 3DPG)(Malet et al., 2009) (right, bottom right). Dash – gap in alignment. Colon - similar amino acid. Period – dissimilar amino acid. Line – identical amino acid.

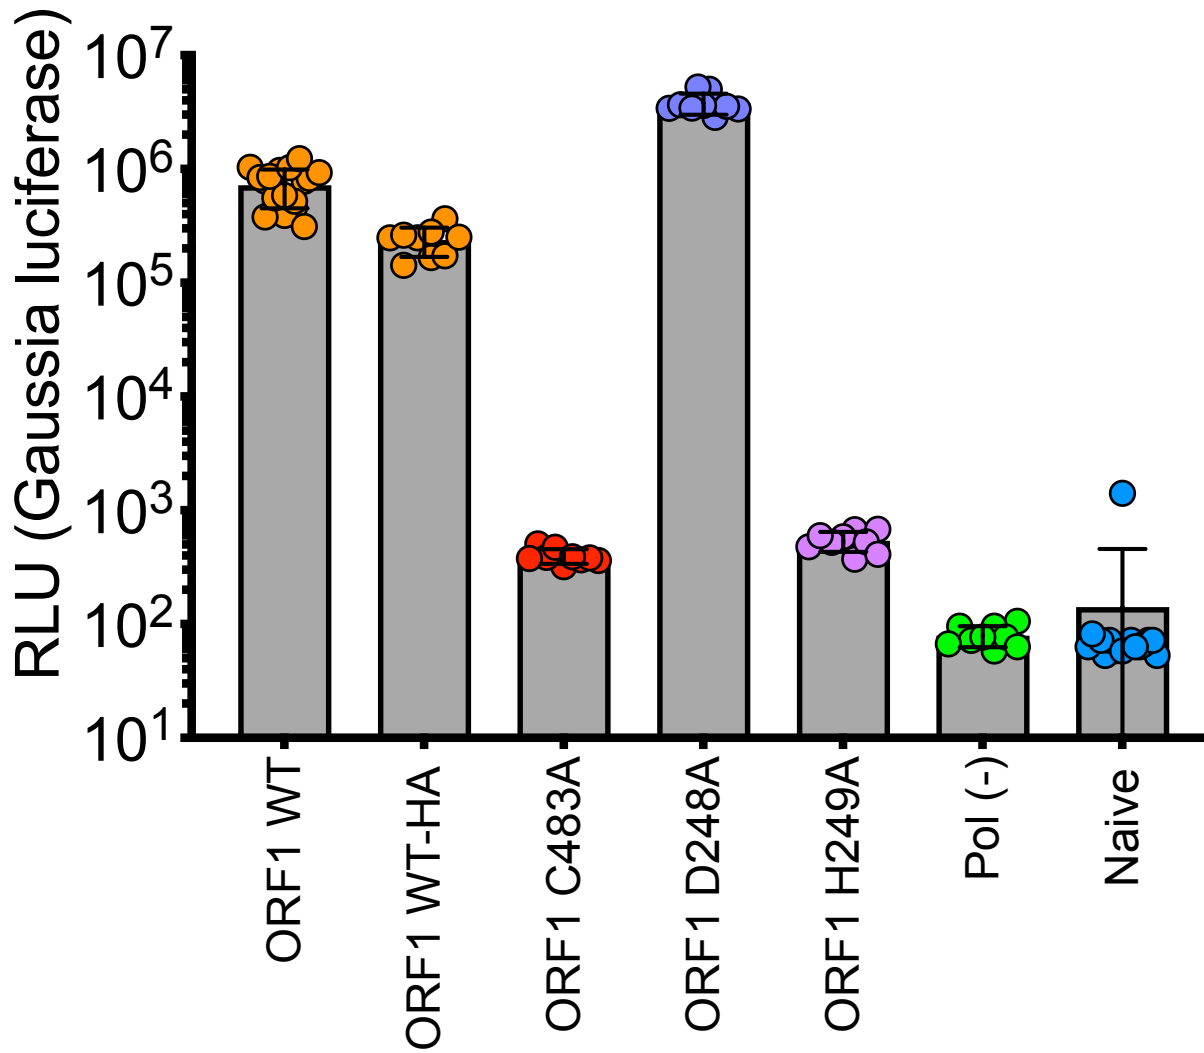

**Supplementary Figure 5: Replication end point analysis of WT-HA, D248A, and H249A Gluc constructs.** HepG2C3A cells were transfected with *in vitro* transcribed RNA of WT, polymerase deficient, WT-HA-tagged, or point mutants in one of the upstream interacting Y-domain (D248A, H249A). Cell culture supernatants were collected for four days post transfection prior to *Gaussia* luciferase quantification.

## Supplementary Table 1: Primer sequences for all constructs in this study.

| Construct                          | Primer Name | Sequence                                   |
|------------------------------------|-------------|--------------------------------------------|
| HEV Kermow-C1 p6 C483A-Gluc        | PU-O-5702   | CAGGAGTGCACCGCTTCTCGAGCCAGCCGAGGGTTTA      |
|                                    | PU-O-5703   | TGGCTCCAGGAAAGCGGTGCACCTCTGCCTAACCCCG      |
| HEV Kermow-C1 p6 GAD-Gluc          | PU-O-2711   | CTGCCTTAAAGGGTGTGATTGCGTGTCTCT             |
|                                    | PU-O-2712   | AGGACCACCGAATCAGCACCTTAAAGGGCAG            |
| pSAR55 C483A-Gluc                  | PU-O-5698   | CAGGAGTGCACCGCTTCTACAACCTGCAGAAAGCGTCTG    |
|                                    | PU-O-5699   | AGGTGTAGAAAAGCGGTGCACCTCTGGCCAGCCACTTC     |
| pSAR55 GAD-Gluc                    | PU-O-4635   | CTGCCTTAAAGGGTGTGATTGCGATGATGCT            |
|                                    | PU-O-4636   | AGCACTATCGAATCAGACCTTAAAGGGCAG             |
| pGEM-92f-pSHEV3 C483A-Gluc         | PU-O-5696   | CAGGAGTGCACCGCTTCTCGAGCCAGCCGAAGGCTTG      |
|                                    | PU-O-5697   | TGGCTCCAAGAAAGCGGTGCACCTCTGCCTAACCCCG      |
| pGEM-92f-pSHEV3 GAD-Gluc           | PU-O-4376   | CCGCCTCAAGGGTGTGATTGCGTGTCTCT              |
|                                    | PU-O-4377   | AGGACCACCGAATCAGCACCTTGAAGCGGG             |
| pGEM-72(-)-TW6196E C483A-Gluc      | PU-O-5700   | CAAGACTGCACCGCTTCTTCAGCTATTGAGGGGAGG       |
|                                    | PU-O-5701   | AGGCTGAAGAAAGCGGTGCAGCTTGCACCTAGCCACCG     |
| pGEM-72(-)-TW6196E GAD-Gluc        | PU-O-4631   | CGGCATTAAGGGGTGACTGTGTGTGCT                |
|                                    | PU-O-4632   | AGCAACAAGAGTGCACCTCTTAAATGCCG              |
| Kermow c1p6 C483S Gluc             | PU-O-5893   | GGGCAGGAGTGCACCTTCTCGAGCCAGCCG             |
|                                    | PU-O-5894   | GGCTGGCTCCAGGAAAGCGGTGCACCTCTGCCTAAC       |
| Kermow c1p6 C483C (TG1) Gluc       | PU-O-6273   | GTGCACCTGTTCTCGAGCCAGCCGAGG                |
|                                    | PU-O-6274   | AGGAACAGGTGCACCTCTGCCTAACCC                |
| Kermow c1p6 Y590A Gluc             | PU-O-5790   | GGCCAGAGCAGGCTCTGTGATTGACGCTCTCTG          |
|                                    | PU-O-5791   | CAATGACAGGACGCTCTGTGGCCATTGCTTCAAG         |
| Kermow c1p6 Y590F Gluc             | PU-O-5891   | GAATGGCCAGAGCGATTTGCTGTCTATTGACGC          |
|                                    | PU-O-5892   | GTCAATGACAGGACAACCTGCTGTGGCCATTGCG         |
| Kermow c1p6 Y590L Gluc             | PU-O-5238   | GAATGGCCAGAGCGATTTGCTGTCTATTGAC            |
|                                    | PU-O-5239   | GTCAAAATGACAGGACAACCTGCTGTGGCCATTG         |
| Kermow c1p6 C483G Gluc             | PU-O-5240   | GGGCAGGAGTGCACCGCTTCTCGAGCCAGCCG           |
|                                    | PU-O-5241   | GGCTGGCTCCAGGAAAGCGGTGCACCTCTGCCT          |
| Kermow c1p6 C483A (GCT) Gluc       | PU-O-6060   | AGCGGTGCACCTGCCCTAACCCCG                   |
|                                    | PU-O-6061   | CAGGAGTGCACCGCTTCTCGAGCCCA                 |
| Kermow c1p6 C483A (GCA) Gluc       | PU-O-6290   | CAGGAGTGCACCGATTCTCGAGCCCA                 |
|                                    | PU-O-6291   | TGCGGTGCACCTCTGCCCTAACCCCG                 |
| Kermow c1p6 C483A (GGC) Gluc       | PU-O-6292   | CAGGAGTGCACCGGTTCTCGAGCCCA                 |
|                                    | PU-O-6293   | CGCGGTGCACCTGCCCTAACCCCG                   |
| Kermow c1p6 C483A (GCC) Gluc       | PU-O-6288   | CAGGAGTGCACCGCTTCTCGAGCCCA                 |
|                                    | PU-O-6289   | GGCGGTGCACCTCTGCCCTAACCCCG                 |
| Kermow c1p6 Q433A C434A R435A Gluc | PU-O-7667   | CAGTCCAGTTTTATGCAGCTGCAGCTGGGTACTCTG       |
|                                    | PU-O-7668   | CAGATAGCCAGCGAGCTGCAGCTGCATAAACTGGAGCTG    |
| Kermow c1p6 R436A W437A L438A Gluc | PU-O-7669   | GCACAGTCCGAGCTGCAGCTTCTCGAGGATTCATCTG      |
|                                    | PU-O-7670   | CCAGATGGAATCTGCAGAACTGCAGCTGGCACTGTGG      |
| Kermow c1p6 S439A A440A G441A Gluc | PU-O-7671   | CACAGTCCGAGCGGTGCTGCAGCTGCAGCTGCAG         |
|                                    | PU-O-7672   | GTCCAGATGGAAGCTGCAGCTGCAGCTGGCCAGCTG       |
| Kermow c1p6 F442A H443A L444A Gluc | PU-O-7673   | GGCTATCTGCAGGAGCTGCAGCTGCAGCTGGGTGCTG      |
|                                    | PU-O-7674   | CAAGCACCTGGGTGCAGCTGCAGCTGCAGATAGCC        |
| Kermow c1p6 D445A P446A R447A Gluc | PU-O-7675   | GCAGGATTCATCTGCTGCAGCTGCTGTTTTGATG         |
|                                    | PU-O-7676   | CATCAAAAACAGCAGCAGCTGCAGCTGCAGCTGCAG       |
| Kermow c1p6 W448A L449A V450A Gluc | PU-O-7677   | CAGGATTCATCTGCAGCCAGGCTGCAGCTTTGATGAATCAG  |
|                                    | PU-O-7678   | CTGATTCATAAAAGCTGCAGCTGGGTCCAGATGGAATCTG   |
| Kermow c1p6 F451A D452A E453A Gluc | PU-O-7679   | CCCCAGGTTGCTTGTGCTGCAGCTGCAGCTGCAG         |
|                                    | PU-O-7680   | GCACATGCAGCTGAAGCTGCAGCAACGACCTCCGGG       |
| Kermow c1p6 S454A V455A P456A Gluc | PU-O-7681   | GGGTGCTGTTTTGATGAAGCTGCAGCTGCTGTTGATG      |
|                                    | PU-O-7682   | CTTACACGCAAGCTGCAGCTGCAGCTGCAGCTGCAG       |
| Kermow c1p6 C457A R458A C459A Gluc | PU-O-7683   | GATGAATCAGTGCAGCTGCAGCTGCAGCTGCAGCTGCAG    |
|                                    | PU-O-7684   | CTCAGGAAGCTGCAGCTGCAGCTGCAGCTGCAGCTGCAG    |
| Kermow c1p6 R460A T461A F462A Gluc | PU-O-7685   | CAGTGCATGCTGTTGCTGCAGCTGCAGCAAGCTGC        |
|                                    | PU-O-7686   | GGCCTTCTCAGAGCTGCAGCAAGCTGCAGCTGCAG        |
| Kermow c1p6 L463A K464A K465A Gluc | PU-O-7687   | CGTTGTAGGAGTTCGCTGCAGCTGCAGCTGCAGCTGCAG    |
|                                    | PU-O-7688   | GAATTTACCCGCGAGCTGCAGCAAGCTGCAGCTGCAG      |
| Kermow c1p6 V466A G468A Gluc       | PU-O-7689   | CCTGAGAAAGCTGCAGCTGCAGCTGCAGCTGCAGCTGCAG   |
|                                    | PU-O-7690   | CCGCATAAAACAGCAGAAATTTAGCTGCAGCTTCTCAGG    |
| Kermow c1p6 K469A F470A C471A Gluc | PU-O-7691   | GAAGAAAGTGCAGGCTGCAGCTGCTGTTTATGCGGTGG     |
|                                    | PU-O-7692   | CCACCGCATAAAACAGCTGCAGCTGCAGCTGCAGCTGCAG   |
| Kermow c1p6 C472A F473A M474A Gluc | PU-O-7693   | GAAGTCCGCGGTAATTTCTGCAGCTGCAGCTGCAGCTGCAG  |
|                                    | PU-O-7694   | CTAACCCGAGCTGCAGCTGCAGCTGCAGCTGCAGCTGCAG   |
| Kermow c1p6 R475A W476A L477A Gluc | PU-O-7695   | CTGCTGTTTTATGCTGCAGCTGCAGGAGGACCTGC        |
|                                    | PU-O-7696   | GCAGGTGCACTCTGCCAGCTGCAGCTGCAGCTGCAGCTGCAG |
| Kermow c1p6 G478A Q479A E480A Gluc | PU-O-7697   | GTTTTATGCGGTGTTAGCTGCAGCTGCAGCTGCAGCTGCAG  |
|                                    | PU-O-7698   | GGAAAGCAGGTGCAGCTGCAGCTGCAGCTGCAGCTGCAG    |
| Kermow c1p6 C481A T482A C483A Gluc | PU-O-7699   | GGTTAGGCGAGGCTGCAGCTTCTGAGCCAGCGG          |
|                                    | PU-O-7700   | CGCTGCTCCAGAAAGCTGCAGCTCTGCTCTAAC          |
| Kermow c1p6 484A L485A E486A Gluc  | PU-O-7701   | GGGCAGGAGTGCACCTGCAGCTGCAGCTGCAGCTGCAG     |
|                                    | PU-O-7702   | CTCGCTGGAGCTGCAGCTGCAGCTGCAGCTGCAGCTGCAG   |
| Kermow c1p6 P487A E489A Gluc       | PU-O-7703   | GCACCTGCTCTGAGGCTGCAGCTGCTGTTTATGTTGGG     |
|                                    | PU-O-7704   | CGCCAACTAACCAAGCTGCAGCTGCAGCTGCAGCTGCAG    |
| Kermow c1p6 G490A L491A V492A Gluc | PU-O-7705   | CCTGGAGCCAGCGAGCTGCAGCTGCAGCTGCAGCTGCAG    |
|                                    | PU-O-7706   | GGCCATGTTGCGAGCTGCAGCTGCAGCTGCAGCTGCAG     |
| Kermow c1p6 G493A D494A H495A Gluc | PU-O-7707   | CAGCCGAGGTTTATGCTGCAGCTGCAGCTGCAGCTGCAG    |
|                                    | PU-O-7708   | CATTGTCTAGCCAGCTGCAGCAACTAACCCCTGCCTG      |
| Kermow c1p6 G496A H497A D498A Gluc | PU-O-7709   | GTTTATGTTGGCAGCTGCAGCTGCAGCTGCAGCTGCAG     |
|                                    | PU-O-7710   | CATAAGCTCATTTAGCTGCAGCTGCAGCTGCAGCTGCAG    |
| Kermow c1p6 N499A E500A Gluc       | PU-O-7711   | GGCCATGAGCTGCAGCTGCAGCTGCAGCTGCAGCTGCAG    |
|                                    | PU-O-7712   | GGTGCACCTCAGAACTTCAAGCTGCAGCTGCAGCTGCAG    |

|                                                           |                          |                                                                                         |
|-----------------------------------------------------------|--------------------------|-----------------------------------------------------------------------------------------|
| Kernow c1p6 Y502A E503A G504A Gluc                        | PU-O-7713<br>PU-O-7714   | CCATGACAATGAGGCTGCTGAGCTTCTGAGGTCGACCAAG<br>CTGGTCGACCTCAGAAAGCTGAGCAGCCTCATGTCATGG     |
| Kernow c1p6 S505A E506A V507A Gluc                        | PU-O-7715<br>PU-O-7716   | GGCTTATGAAGGTGCTGAGCTGACCAAGGCTGAACCTGCC<br>GGCAGGTTCAAGCTGCTGAGCTGACCACTCATAAAGCC      |
| Kernow c1p6 D508A Q509A Gluc                              | PU-O-7717<br>PU-O-7718   | GAAGGTTCTGAGGTGCTGAGCTGAACCTGCCATC<br>GATGGCAGGTTGAGCTGACGACCTCAGAACCTTC                |
| Kernow c1p6 E511A P512A Gluc                              | PU-O-7719<br>PU-O-7720   | GAGGTGACCAAGGCTGCTGAGCTCATCTTGTATTTCCGG<br>CCGAAACATCAAGATGAGCTGACGACCTGGTGCAGCTC       |
| Kernow c1p6 H514A L515A D516A Gluc                        | PU-O-7721<br>PU-O-7722   | CAGGCTGAACCTGCCGCTGAGCTGTTCCGGGACTTATG<br>CATAAGTCCCGAAACAGCTGACGCGCAGGTTGAGCTCG        |
| Kernow c1p6 V517A S518A G519A Gluc                        | PU-O-7723<br>PU-O-7724   | CCTGCCATCTGATGCTGAGCTACTTATGCCGTCACAG<br>CGTGGACGGCATAGTACTGACGATCAAGATGGGCAAGG         |
| Kernow c1p6 T520A Y521A Gluc                              | PU-O-7725<br>PU-O-7726   | GCCCATCTTGATGTTCCGGGGCTGAGCTGCCAGGGCC<br>GCCCTGGACAGCTGACGCCCGAAACATCAAGATGGGC          |
| Kernow c1p6 V523A H524A G525A Gluc                        | PU-O-7727<br>PU-O-7728   | GTTTGGGGGACTTATGCCGCTGAGCTACCAGCTGTAG<br>CTACAAGCTGTGAGCTGACGCGCATAAGTCCCGAAAC          |
| Kernow c1p6 H526A Q527A L528A Gluc                        | PU-O-7729<br>PU-O-7730   | GCCGTCACGGGGCTGAGCTGTAGCCCTCATAGGGCC<br>GCCCTATAGAGGGCTACAGCTGACGCCCGTGACGGC            |
| Kernow c1p6 V529A L531A Gluc                              | PU-O-7731<br>PU-O-7732   | CCACGGGACCAAGCTGCTGAGCTTATAGGGCACTTAATG<br>CATTAAAGTCCCTAAGCTGACGCAAGCTGTGCCCCGTTG      |
| Kernow c1p6 Y532A R533A Gluc                              | PU-O-7733<br>PU-O-7734   | CCAGCTTGTAGCCCTGCTGAGCTTAATGTTCCAC<br>GTGGACATTAAGAGCTGACGCGGCTACAAGCTGG                |
| Kernow c1p6 L535A N536A V537A Gluc                        | PU-O-7735<br>PU-O-7736   | GCCCTCATAGGCGAGCTGAGCTCCATGATATGCCG<br>CGGCAATATCATGTGGAGCTGACCTGCCATAGAGGGC            |
| Kernow c1p6 P538A H539A D540A Gluc                        | PU-O-7737<br>PU-O-7738   | GGGCACTAATGCTGCTGAGCTATTGCCGCTGAGC<br>GCTCGAGCGCAATAGCTGACGACATTAAGTGCC                 |
| Kernow c1p6 I541A Gluc                                    | PU-O-7739<br>PU-O-7740   | GTCCCATGATGCTGAGCTGAGCTCCCGATTAACGG<br>CCGTTAATCGGGAAGCTGAGCTGACGATCATGTGGAC            |
| Kernow c1p6 R544A S546A Gluc                              | PU-O-7741<br>PU-O-7742   | CCACATGATATTGCCGCTGCTGAGCTGATTAACGGC<br>GCCGTTAATCGAGCTGACGCGGCAATATCATGTGGG            |
| Kernow c1p6 R547A L548A T549A Gluc                        | PU-O-7743<br>PU-O-7744   | GCCGCTCGAGCTCCGCTGAGCTGCTACTGTTGAGC<br>GCTCAACAGTACGAGCTGACGCGAAGCTGACGCGC              |
| Kernow c1p6 T551A V552A Gluc                              | PU-O-7745<br>PU-O-7746   | CCCGATTAAGCGCTGAGCTGAGCTGTTGAGGTCACG<br>CTGACCTGCAACAAGCTGAGCTGACCGTTAATCGGG            |
| Kernow c1p6 E553A L554A V555A Gluc                        | PU-O-7747<br>PU-O-7748   | GGGCTACTGTTGCTGAGCTGAGGTCAGACCGCTTGG<br>CCAAGCGGCTGAGCTGAGCTGACGCAACAGTAGCCG            |
| Kernow c1p6 G557A P558A Gluc                              | PU-O-7749<br>PU-O-7750   | CGGCTACTGTTGAGCTGTTGCTGAGCTACCGCTTGGAG<br>CTCAAGCGGTGAGCTGAGCAACAGCTCAACAGTAGCCG        |
| Kernow c1p6 D559A R560A L561A Gluc                        | PU-O-7751<br>PU-O-7752   | GCTTGTGAGGTCAGCTGAGCTGAGTGGCCGAGTGGC<br>GCAAGTGGGCACTGAGCTGAGCTGACCTGCAACAAGC           |
| Kernow c1p6 E562A C563A R564A Gluc                        | PU-O-7753<br>PU-O-7754   | GGTCCAGACCGCTTGGCTGAGCTACTGTGCTCGG<br>CCGAGCACAGTAGCTGACGCAAGCGGCTGAGCC                 |
| Kernow c1p6 T565A V566A L567A Gluc                        | PU-O-7755<br>PU-O-7756   | CCGCTGGAGTGGCCGACTGTGCTCGGTAATAAGACCTC<br>GAAGGTTTATTACCGAGCAGAGTGGCCACTCAAGCGG         |
| Kernow c1p6 G568A N569A K570A Gluc                        | PU-O-7757<br>PU-O-7758   | GTCCGCACTGTGCTGAGCTACTCCGAGCAGCG<br>CGTCTCCGAAAGTACTGAGCAGCAGCAGTGGCGCAC                |
| Kernow c1p6 T571A F572A R573A Gluc                        | PU-O-7759<br>PU-O-7760   | GCTCGGTAATAAGCTGAGCTGACGCGGTTGATGGC<br>GCCATCAACCCGCTGAGCTGAGCTTATTACCGAGC              |
| Kernow c1p6 T574A T575A V576A Gluc                        | PU-O-7761<br>PU-O-7762   | GTAATAAGACCTCCGGCTGAGCTGTTGATGGCCCG<br>GGGCGCATCAACAGCTGACCGCGAAGTCTTATTAC              |
| Kernow c1p6 V577A D578A G579A Gluc                        | PU-O-7763<br>PU-O-7764   | GTAATAAGACCTCCGAGGACGTTGGCTGAGCTCCATCTG<br>CAAGATGGGAGCTGACGACCGCTGCGGAAAGTCTTATTAC     |
| Kernow c1p6 H581A L582A Gluc                              | PU-O-7765<br>PU-O-7766   | CGGTGGTTGATGGGCTGAGCTGAAGCAATGGCCAG<br>CTGGCCATTGCTGAGCTGAGCCATCAACCCG                  |
| Kernow c1p6 E583A N585A Gluc                              | PU-O-7767<br>PU-O-7768   | GATGGCGCCATCTGCTGAGCTGCCAGAGCATGTG<br>CATACTGCTGCGGCGAGCTGACGCAAGATGGGCGCATC            |
| Kernow c1p6 G586A P587A E588A Gluc                        | PU-O-7769<br>PU-O-7770   | CCCCTTGAAGCGAATGCTGAGCTCAGTATGCTCTGTC<br>GACAGGACATACTGAGCTGAGCATTGCTTCAAGATGGG         |
| Kernow c1p6 Q589A Y590A V591A Gluc                        | PU-O-7771<br>PU-O-7772   | GGCAATGCCCAAGGCTGAGCTGCTGCTATTGACCG<br>GGCGTCAATGACAGAGCTGACCTCTGGCCATTGCGC             |
| Kernow c1p6 Y590A V591A L592A Gluc                        | PU-O-7773<br>PU-O-7774   | GGCCAGAGCAGGCTGAGCTTATTGACGCTCTGCTC<br>GACAGGAGGCGTCAATGAAGCTGAGCTGCTGGGCC              |
| Kernow c1p6 C434A Gluc                                    | PU-O-7775<br>PU-O-7776   | CCAGTTTTATGACAGCCCGAGGCTGCTATCTGACGG<br>CTGACAGATGACCCGCTGGGCTGTGCAAAAAGTGG             |
| Kernow c1p6 C457A Gluc                                    | PU-O-7777<br>PU-O-7778   | GATGAATCAGTGCAGCTGTTGAGGACGTTCTCAGG<br>CTTCAAGGAGTCTCAACAGCTGAGGACTGATTCATC             |
| Kernow c1p6 C459A Gluc                                    | PU-O-7779<br>PU-O-7780   | GAATCAGTGCCATGCTGCTAGGACGTTCTCAGG<br>CTTCAAGGAGTCTCAACAGCTGAGGACTGATTCATC               |
| Kernow c1p6 C471A Gluc                                    | PU-O-7781<br>PU-O-7782   | GAAAGTCCGGGTAATTCGCTGTTTATGGGTTGTTAG<br>CTAACCCGATAAAACAGCGAATTAACCGGACTTTC             |
| Kernow c1p6 C472A Gluc                                    | PU-O-7783<br>PU-O-7784   | GTCCGGGTAATTCGCTGTTTATGGGTTGTTAGGG<br>CCCTAACCCGATAAAACAGCGAATTAACCGGACTTTC             |
| Kernow c1p6 C481A Gluc                                    | PU-O-7785<br>PU-O-7786   | GGGGTGGTTAGGGCAGGAGGCACTGCTTCTGAGCC<br>GGCTCAGGAAGCAGGTGCTGCTCCCTAACCCGCTC              |
| Kernow c1p6 C563A Gluc                                    | PU-O-7787<br>PU-O-7788   | GCAAGTCCAGACCGCTTGGAGGCCGACTGTGCTGG<br>CCGAGCAGAGTGGGGCTCCAGGCGGCTGAGACTGC              |
| Kernow c1p6 D248A Gluc                                    | PU-O-10292<br>PU-O-10293 | CTACTAAAATAGTTGGTCCCAACCGCTGTTATAGAGCGTG<br>CCAACCGGTGGCCACCACTATTATTAGTACGATCC         |
| Kernow c1p6 H249A Gluc                                    | PU-O-10294<br>PU-O-10295 | CGTACTACTAAAATAGTTGGTACGCCCCGTTGGTTAGAGC<br>GCCCGCACAGCTCTATAAACCAACGGGGCTCACCAACTTTTAG |
| AAAPG-HA tag-AAAPG from pLVX ORF2-HA                      | PU-O-9180<br>PU-O-9183   | GCTGCCCCGGGGCGCCGACCAAGATccatcaagat<br>GTTAGGTTGGGGCAGTCTGGTGGGGCCGaggtattctg           |
| PCR linearize p6/BSR-2A-ZsGreen insert AAAPG-HA tag-AAAPG | PU-O-9229<br>PU-O-9228   | CTGCCCACTACCCCGCTGCTAGTATTTGGGGTTAC<br>CCCCGGGGCAGCAGCTGGAAGCAGGGGGCGG                  |
| PCR linearize Kernow C1/p6 Gluc insert AAAPG-HA tag-AAAPG | PU-O-9229<br>PU-O-9228   | CTGCCCACTACCCCGCTGCTAGTATTTGGGGTTAC<br>CCCCGGGGCAGCAGCTGGAAGCAGGGGGCGG                  |
| ORF1 AAAPG-HA tag-AAAPG                                   | PU-O-9907<br>PU-O-9908   | CGGTGAATTCCTGAGGGCAGACCACTGATGTTGATG<br>CCGCGCGCTCTAGAGGTGATCCATGGGGATGCA               |



|            | Residue 1: | Residue 2: | Length: (Å) |            | Residue 1: | Residue 2: | Length: (Å) |       |
|------------|------------|------------|-------------|------------|------------|------------|-------------|-------|
| ORF1 WT    | C471       | C472       | 4.233       | ORF1 D248A | C471       | C472       | 5.168       |       |
|            | C471       | C481       | 4.808       |            | C471       | C481       | 2.987       |       |
|            | C471       | C483       | 3.327       |            | C471       | C483       | 3.178       |       |
|            | C472       | C481       | 8.305       |            | C472       | C481       | 7.042       |       |
|            | C472       | C483       | 7.193       |            | C472       | C483       | 6.774       |       |
|            | C481       | C483       | 2.047       |            | C481       | C483       | 3.759       |       |
|            | C457       | C459       | 2.047       |            | C457       | C459       | 2.063       |       |
|            | C457       | D248       | 5.704       |            | C457       | H249       | 5.053       |       |
|            | C457       | H249       | 4.623       |            | C459       | H249       | 4.824       |       |
|            | C459       | H249       | 4.599       |            | ORF1 H249A | C471       | C472        | 5.588 |
|            | C459       | D248       | 3.738       |            |            | C471       | C481        | 3.426 |
|            | D248       | H249       | 5.705       |            |            | C471       | C483        | 4.582 |
|            | ORF1 C483A | C471       | C472        |            |            | 5.851      | C472        | C481  |
| C471       |            | C481       | 5.286       | C472       |            | C483       | 4.699       |       |
| C472       |            | C481       | 10.734      | C481       |            | C483       | 2.079       |       |
| C457       |            | C459       | 2.048       | C457       |            | C459       | 2.055       |       |
| C457       |            | D248       | 5.376       | C457       |            | D248       | 4.446       |       |
| C457       |            | H249       | 4.577       | C459       |            | D248       | 3.867       |       |
| C459       |            | H249       | 4.453       |            |            |            |             |       |
| C459       |            | D248       | 3.496       |            |            |            |             |       |
| D248       |            | H249       | 6.088       |            |            |            |             |       |
| ORF1 C563A |            | C471       | C472        | 5.263      |            |            |             |       |
|            | C471       | C481       | 3.525       |            |            |            |             |       |
|            | C471       | C483       | 3.676       |            |            |            |             |       |
|            | C472       | C481       | 7.819       |            |            |            |             |       |
|            | C472       | C483       | 7.976       |            |            |            |             |       |
|            | C481       | C483       | 2.052       |            |            |            |             |       |
|            | C457       | C459       | 2.045       |            |            |            |             |       |
|            | C457       | D248       | 7.162       |            |            |            |             |       |
|            | C457       | H249       | 4.571       |            |            |            |             |       |
|            | C459       | H249       | 3.914       |            |            |            |             |       |
|            | C459       | D248       | 5.239       |            |            |            |             |       |
|            | D248       | H249       | 6.056       |            |            |            |             |       |

**Supplementary Table 2: Predicted bond lengths (Å) of cysteines within HEV hexa-cysteine motif and D248/H249 of upstream Y-domain.** Residue distances between the sulfur atom of the side chains of the cysteine, the 2nd oxygen of the aspartic acid side chain, or the 2nd nitrogen on the side chain of the histidine. Atomic distances were calculated with UCSF Chimera (Pettersen et al., 2004) structure analysis functionality. Orange – bond length beyond biological relevance (residues were considered interacting if within 3Å, as determined by (Zheng et al., 2008)).

## Supplementary Movies:

All supplementary movies show the best ranked model of their respective ORF1 (WT or mutant) predicted with the AlphaFold algorithm. Video 1 exhibits the ORF1-WT AlphaFold prediction, then transitions to a visual representation of the alanine scanning mutagenesis data across the pPCP. Color gradation corresponds fold change of WT of alanine triplet. Below (-2) fold change is orange. Between (-2) and (-1) fold change is sea green. Between (-1) and 0 fold change is cornflower blue, Above WT replication levels is dark blue. Videos 2-6 exhibits the conserved hexa-cysteine motif (magenta), interacting Y-domain residues D248 and H249 (cornflower blue), methyltransferase domain (orange), putative PCP (green), helicase (yellow), RNA dependent RNA polymerase (red), and putative intracellular membrane association site (cyan). Hatched yellow lines – measured distances between sulfur atoms of cysteines, 2nd oxygen of aspartic acid, or second nitrogen of histidine. Orientation of each video is with the putative membrane association site pointing up, with the pseudo zinc-finger comprised of cysteines within the hexa-cysteine motif on the right.

## Supplementary References:

- Bairoch, A., & Apweiler, R. (2000). The SWISS-PROT protein sequence database and its supplement TrEMBL in 2000. *Nucleic Acids Res*, 28(1), 45-48. <https://doi.org/10.1093/nar/28.1.45>
- Bergmann, E. M., Cherney, M. M., McKendrick, J., Frommann, S., Luo, C., Malcolm, B. A., Vederas, J. C., & James, M. N. (1999). Crystal structure of an inhibitor complex of the 3C proteinase from hepatitis A virus (HAV) and implications for the polyprotein processing in HAV. *Virology*, 265(1), 153-163. <https://doi.org/10.1006/viro.1999.9968>
- Boeckmann, B., Bairoch, A., Apweiler, R., Blatter, M. C., Estreicher, A., Gasteiger, E., Martin, M. J., Michoud, K., O'Donovan, C., Phan, I., Pilbout, S., & Schneider, M. (2003). The SWISS-PROT protein knowledgebase and its supplement TrEMBL in 2003. *Nucleic Acids Res*, 31(1), 365-370. <https://doi.org/10.1093/nar/gkg095>
- de Castro, E., Sigrist, C. J., Gattiker, A., Bulliard, V., Langendijk-Genevaux, P. S., Gasteiger, E., Bairoch, A., & Hulo, N. (2006). ScanProsite: detection of PROSITE signature matches and ProRule-associated functional and structural residues in proteins. *Nucleic Acids Res*, 34(Web Server issue), W362-365. <https://doi.org/10.1093/nar/gkl124>
- Malet, H., Coutard, B., Jamal, S., Dutartre, H., Papageorgiou, N., Neuvonen, M., Ahola, T., Forrester, N., Gould, E. A., Lafitte, D., Ferron, F., Lescar, J., Gorbalenya, A. E., de Lamballerie, X., & Canard, B. (2009). The crystal structures of Chikungunya and Venezuelan equine encephalitis virus nsP3 macro domains define a conserved adenosine binding pocket. *J Virol*, 83(13), 6534-6545. <https://doi.org/10.1128/JVI.00189-09>
- O'Donovan, C., Martin, M. J., Gattiker, A., Gasteiger, E., Bairoch, A., & Apweiler, R. (2002). High-quality protein knowledge resource: SWISS-PROT and TrEMBL. *Brief Bioinform*, 3(3), 275-284. <https://doi.org/10.1093/bib/3.3.275>
- Oechslin, N., Da Silva, N., Szkolnicka, D., Cantrelle, F. X., Hanouille, X., Moradpour, D., & Gouttenoire, J. (2022). Hepatitis E virus RNA-dependent RNA polymerase is involved in RNA replication and infectious particle production. *Hepatology*, 75(1), 170-181. <https://doi.org/10.1002/hep.32100>
- Petterson, E. F., Goddard, T. D., Huang, C. C., Couch, G. S., Greenblatt, D. M., Meng, E. C., & Ferrin, T. E. (2004). UCSF Chimera--a visualization system for exploratory research and analysis. *J Comput Chem*, 25(13), 1605-1612. <https://doi.org/10.1002/jcc.20084>
- Proudfoot, A., Hyrina, A., Holdorf, M., Frank, A. O., & Bussiere, D. (2019). First Crystal Structure of a Nonstructural Hepatitis E Viral Protein Identifies a Putative Novel Zinc-Binding Protein. *J Virol*, 93(13). <https://doi.org/10.1128/JVI.00170-19>
- Shin, G., Yost, S. A., Miller, M. T., Elrod, E. J., Grakoui, A., & Marcotrigiano, J. (2012). Structural and functional insights into alphavirus polyprotein processing and pathogenesis. *Proc Natl Acad Sci U S A*, 109(41), 16534-16539. <https://doi.org/10.1073/pnas.1210418109>
- Zheng, H., Chruszcz, M., Lasota, P., Lebioda, L., & Minor, W. (2008). Data mining of metal ion environments present in protein structures. *J Inorg Biochem*, 102(9), 1765-1776. <https://doi.org/10.1016/j.jinorgbio.2008.05.006>
